# Supplementary material for: Visible-light induced di- and trifluoromethylation of N-benzamides with fluorinated sulfones for the synthesis of CF2H/CF3-containing isoquinolinediones
Source: Royal Society of Chemistry journal article supplement (doi:10.1039/c7ob02226c), 2017-01-01

# Supporting Information

## Visible-light Induced di- and trifluoromethylation of *N*-methacryloyl benzamides with fluorinated sulfones for the synthesis of CF<sub>2</sub>H/CF<sub>3</sub>-containing isoquinolinediones

Guanglong Zou<sup>a\*</sup>, Xuelin Wang<sup>b</sup>

a. School of Chemical Engineering, Guizhou Minzu University, Huaxi University  
Town, Guiyang 550025, China

E-mail: chemphys@126.com

b. School of Graduate Students, Guizhou Minzu University, Ten-li Strand Campus,  
Guiyang 550025, China.

### Table of contents

|                                                                                                            |       |
|------------------------------------------------------------------------------------------------------------|-------|
| X-ray diffraction analysis of compound <b>3c</b> and <b>3d</b> .....                                       | 2     |
| The <sup>1</sup> H NMR, <sup>13</sup> C NMR and <sup>19</sup> F NMR Spectra of compounds <b>3a-k</b> ..... | 3-19  |
| The <sup>1</sup> H NMR, <sup>13</sup> C NMR and <sup>19</sup> F NMR Spectra of compounds <b>5a-i</b> ..... | 19-32 |

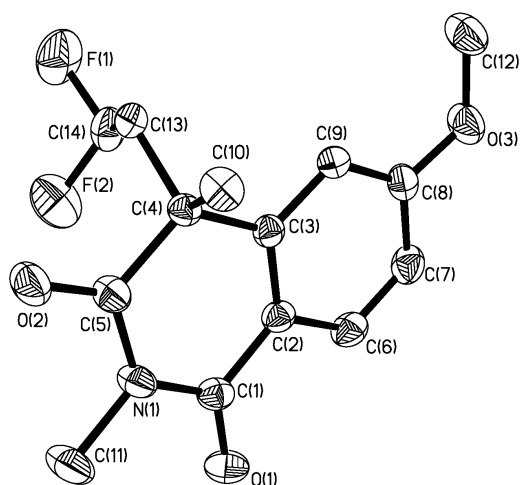

**Figure 1** The ORTEP drawing of **3c** (Thermal ellipsoids are set at 30% probability level)

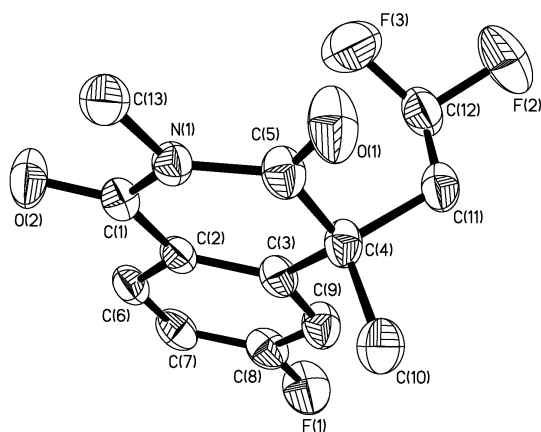

**Figure 2** The ORTEP drawing of **3d** (Thermal ellipsoids are set at 30% probability level)

$^1\text{H}$  NMR,  $^{13}\text{C}$  NMR and  $^{19}\text{F}$  NMR spectra of compound **3a**:

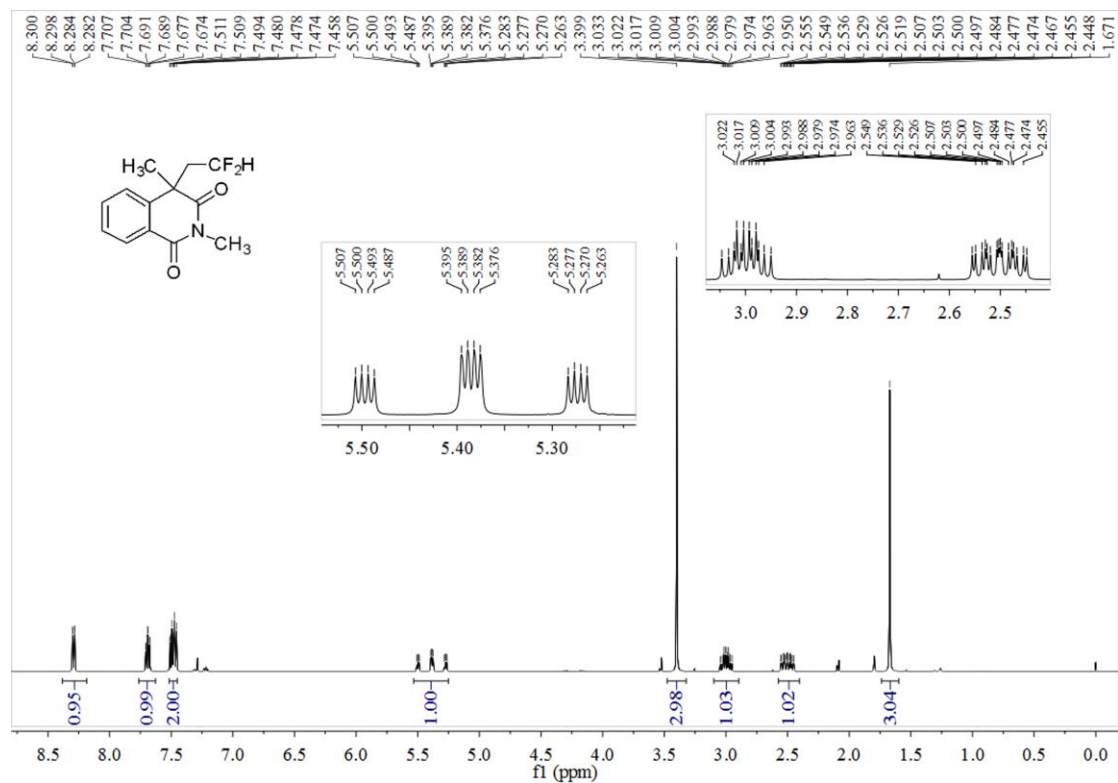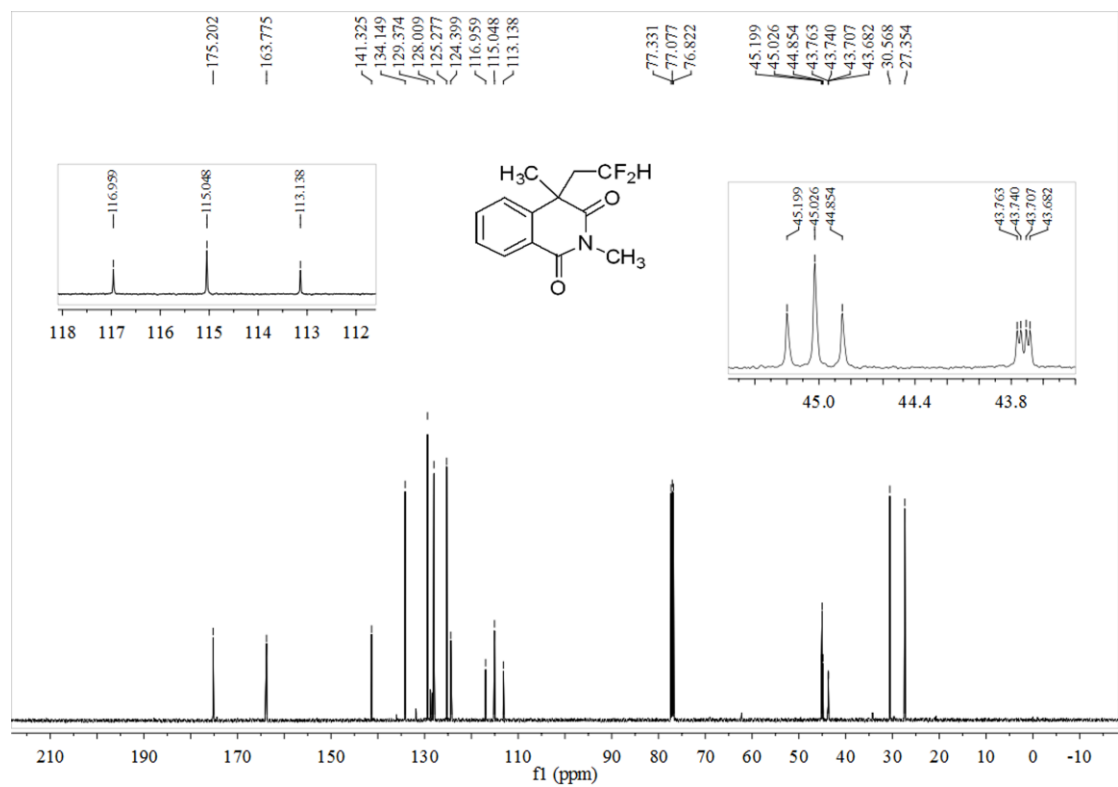

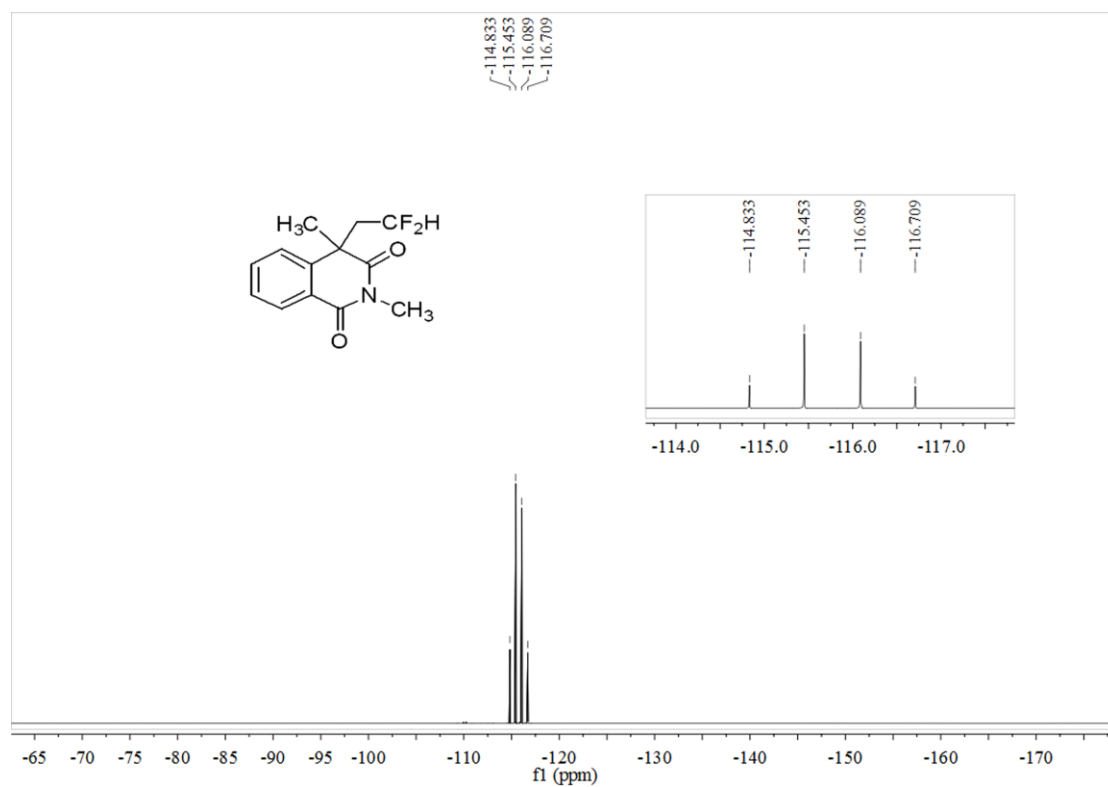

<sup>1</sup>H NMR, <sup>13</sup>C NMR and <sup>19</sup>F NMR spectra of compound **3b**:

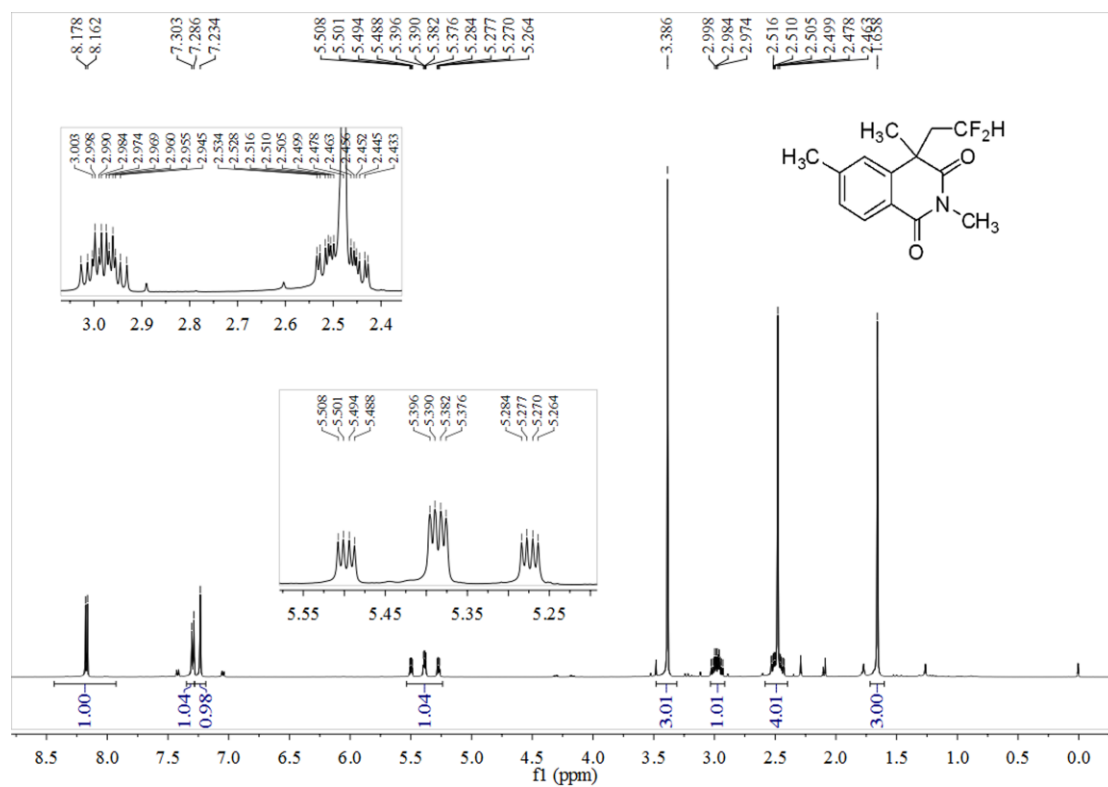

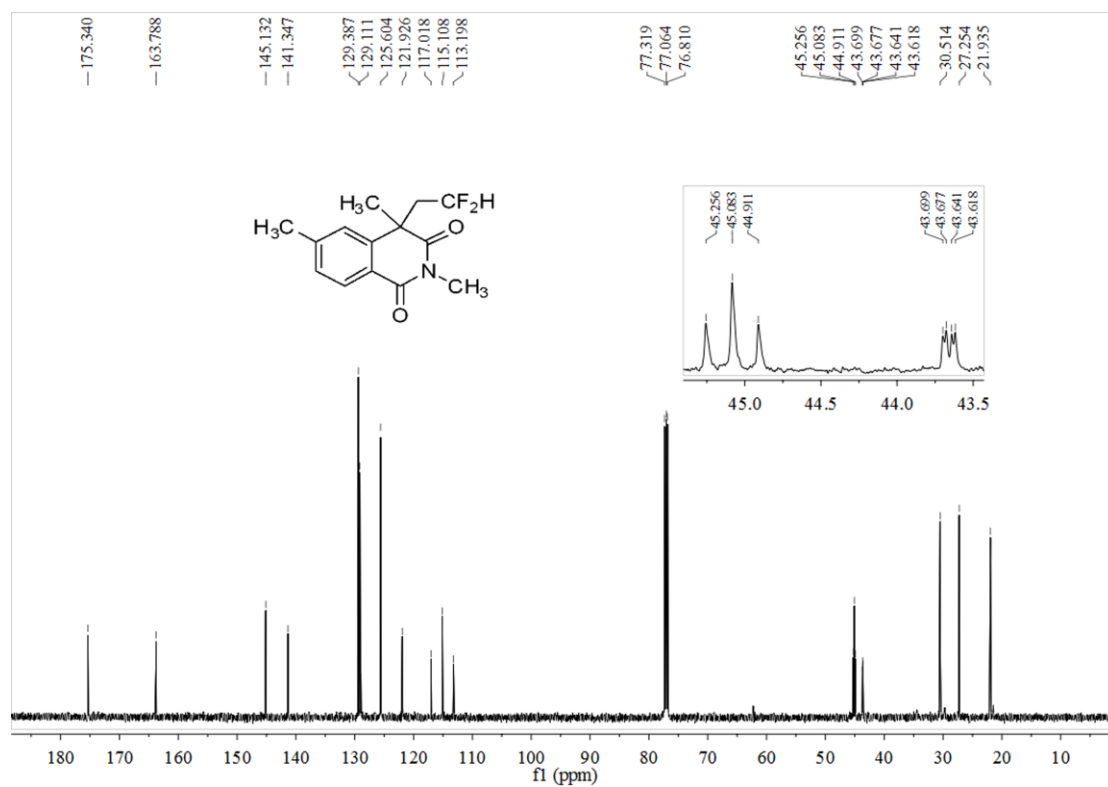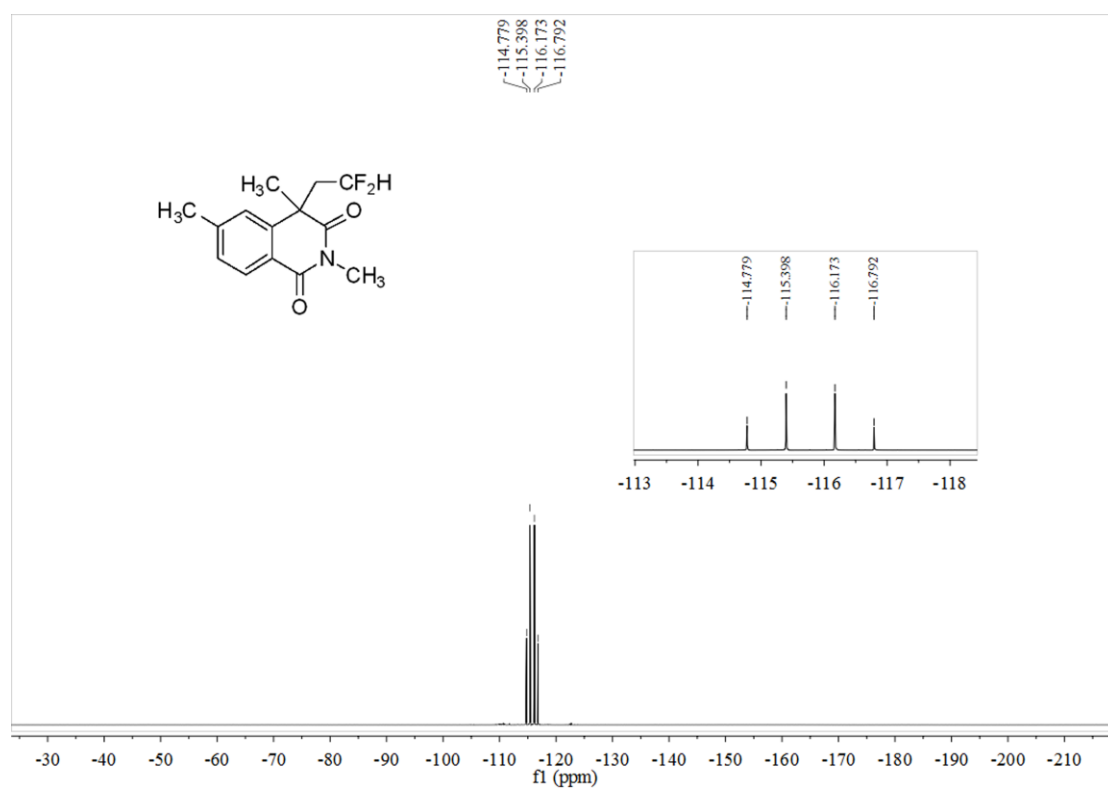

$^1\text{H}$  NMR,  $^{13}\text{C}$  NMR and  $^{19}\text{F}$  NMR spectra of compound **3c**:

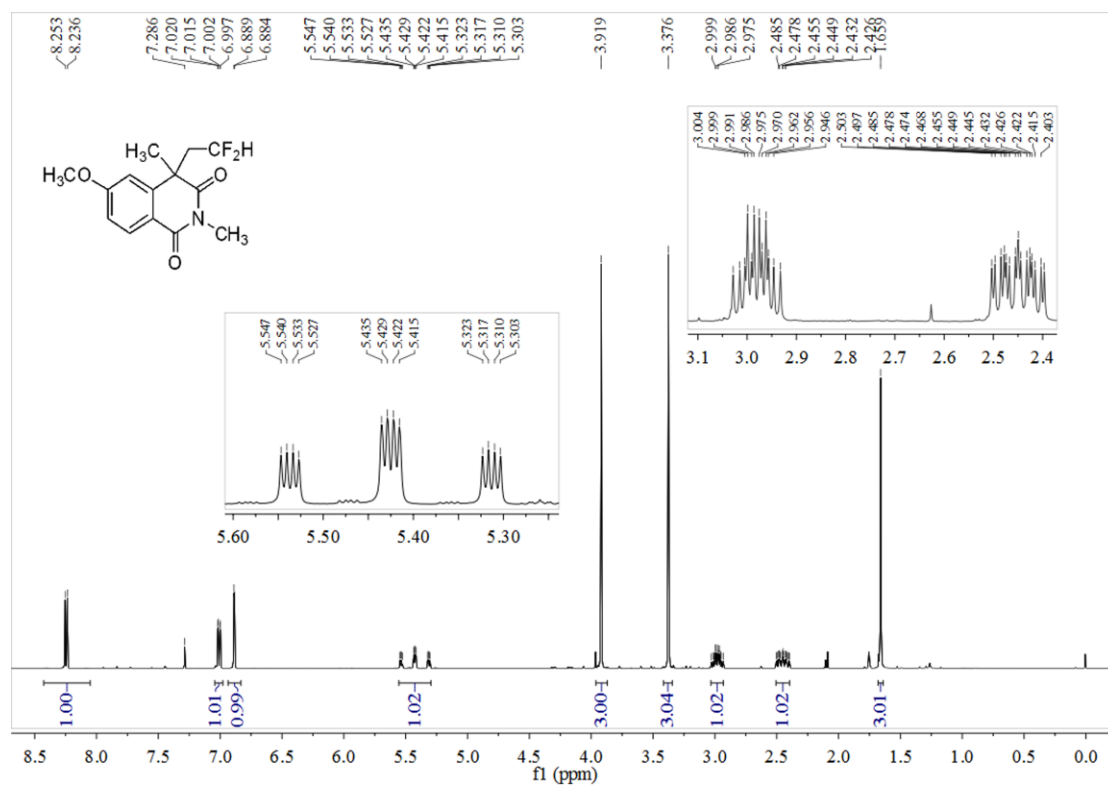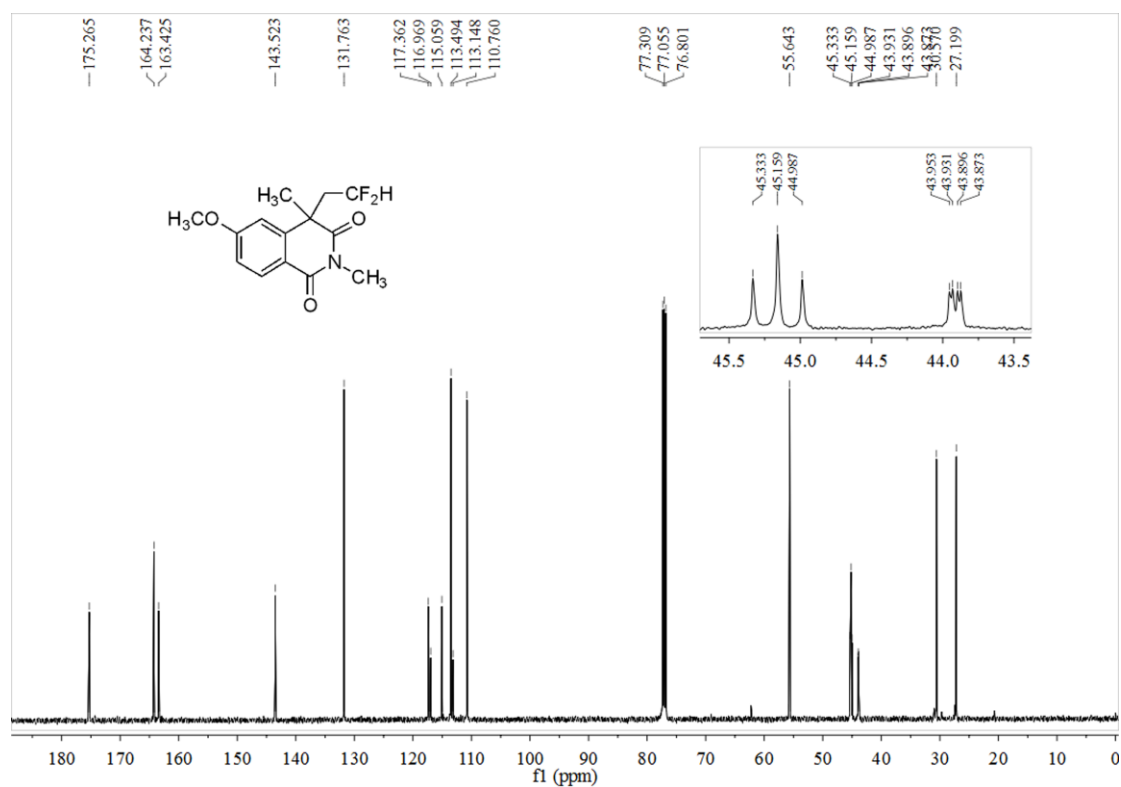

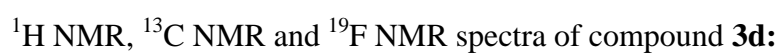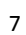

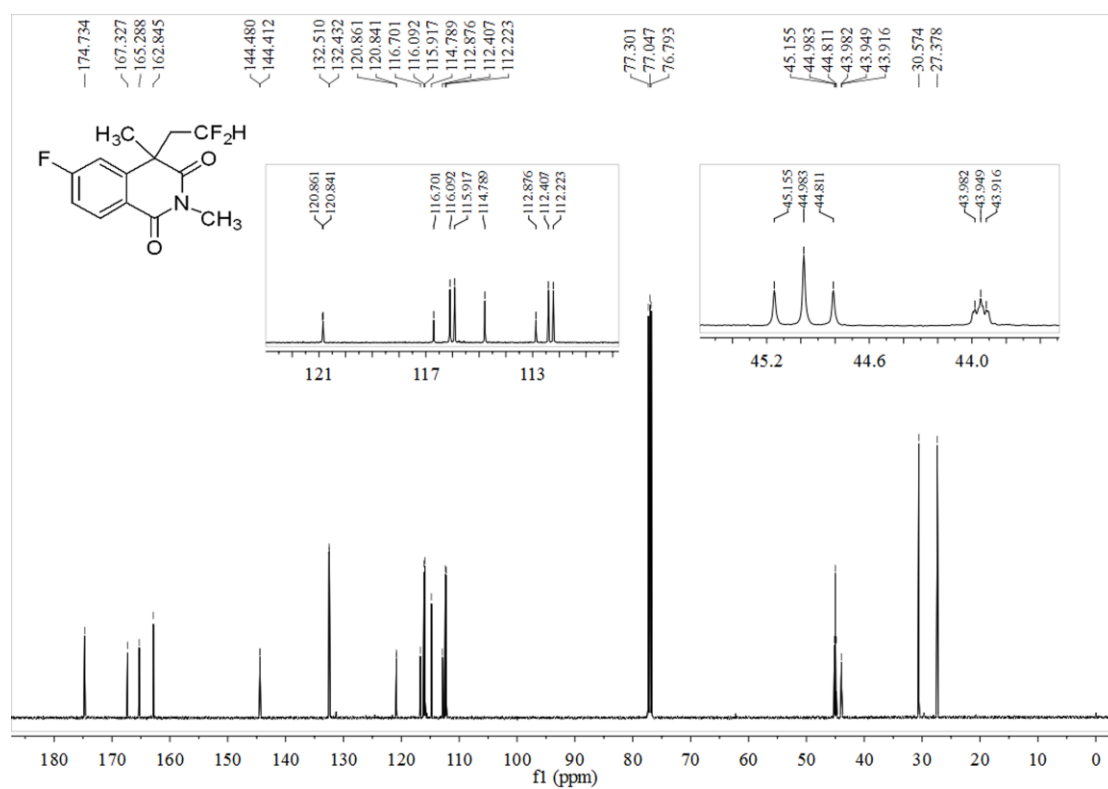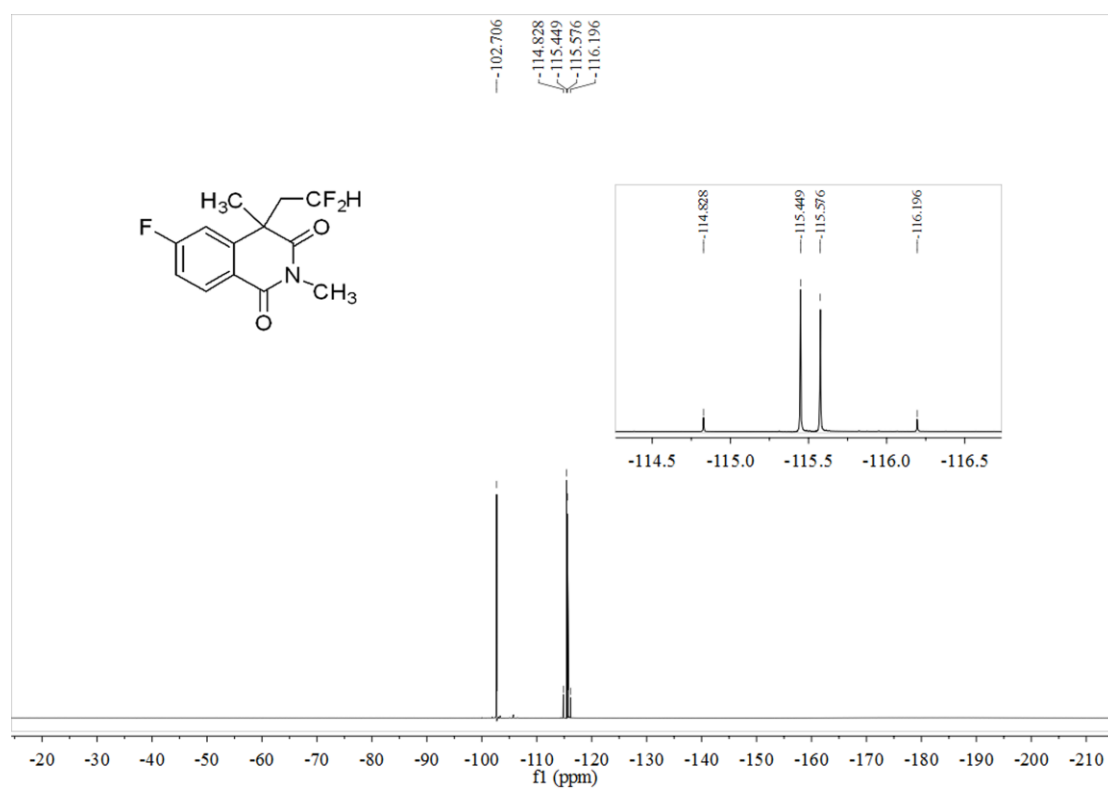



$^1\text{H}$  NMR,  $^{13}\text{C}$  NMR and  $^{19}\text{F}$  NMR spectra of compound **3e**:

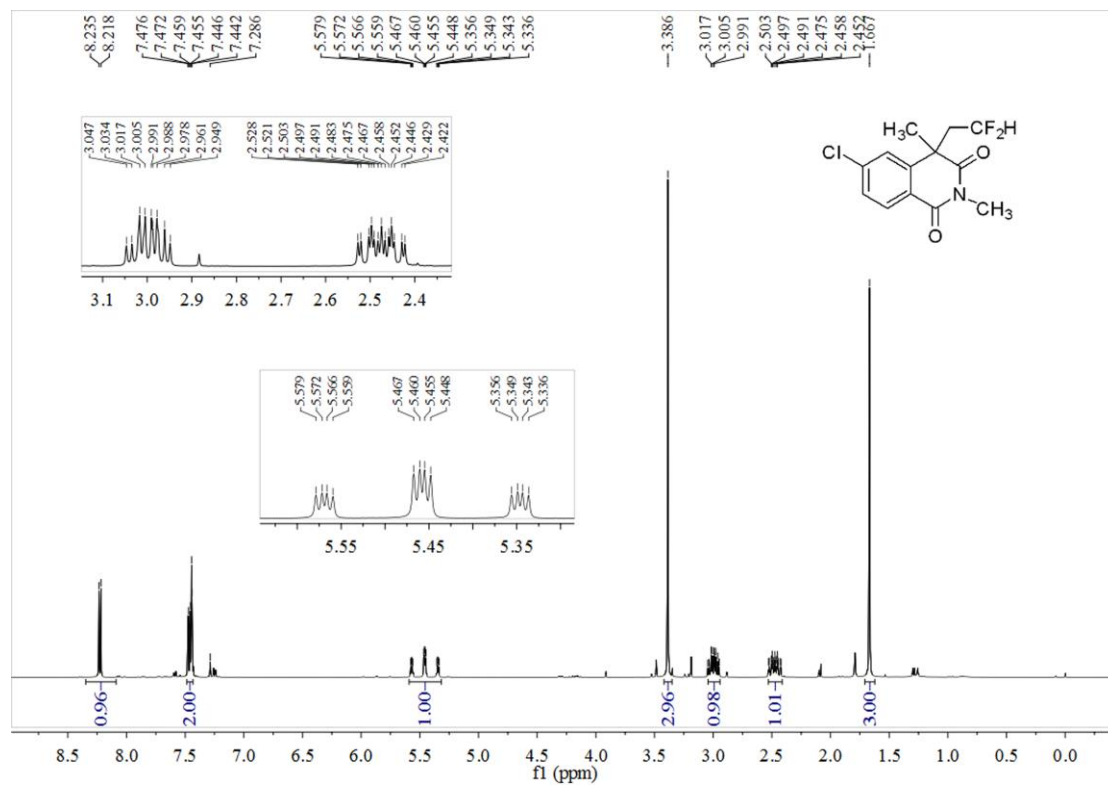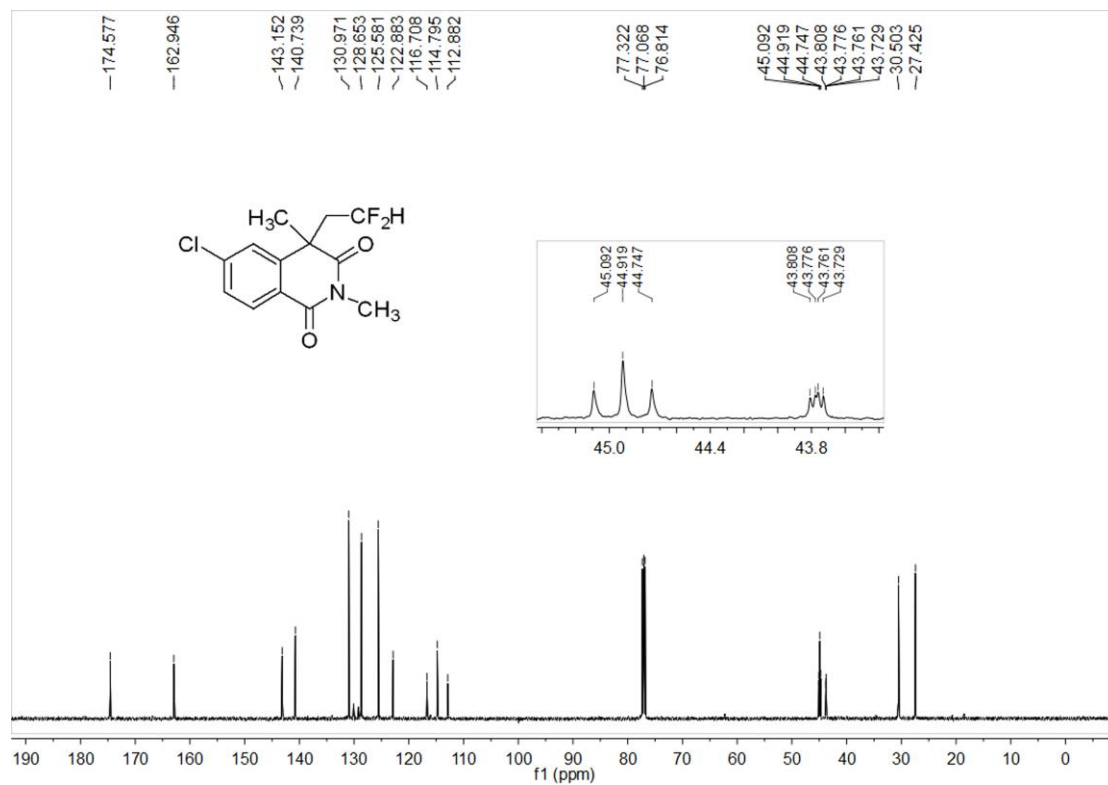

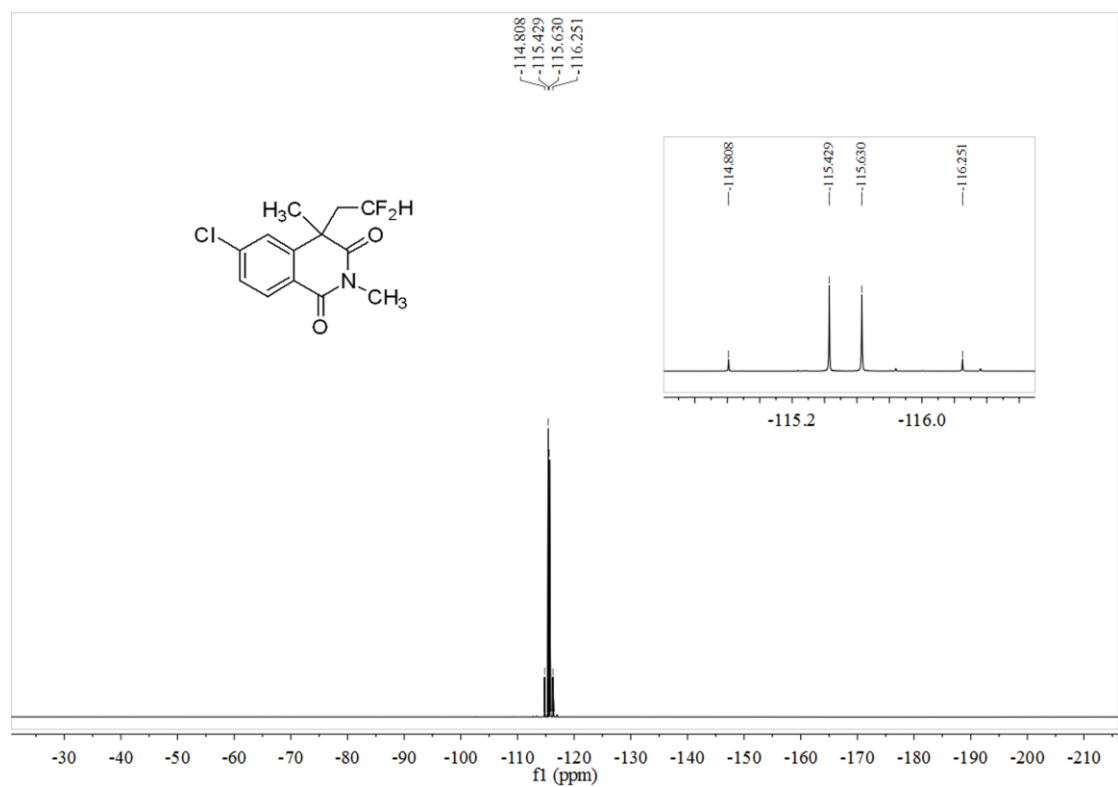

<sup>1</sup>H NMR, <sup>13</sup>C NMR and <sup>19</sup>F NMR spectra of compound **3f**:

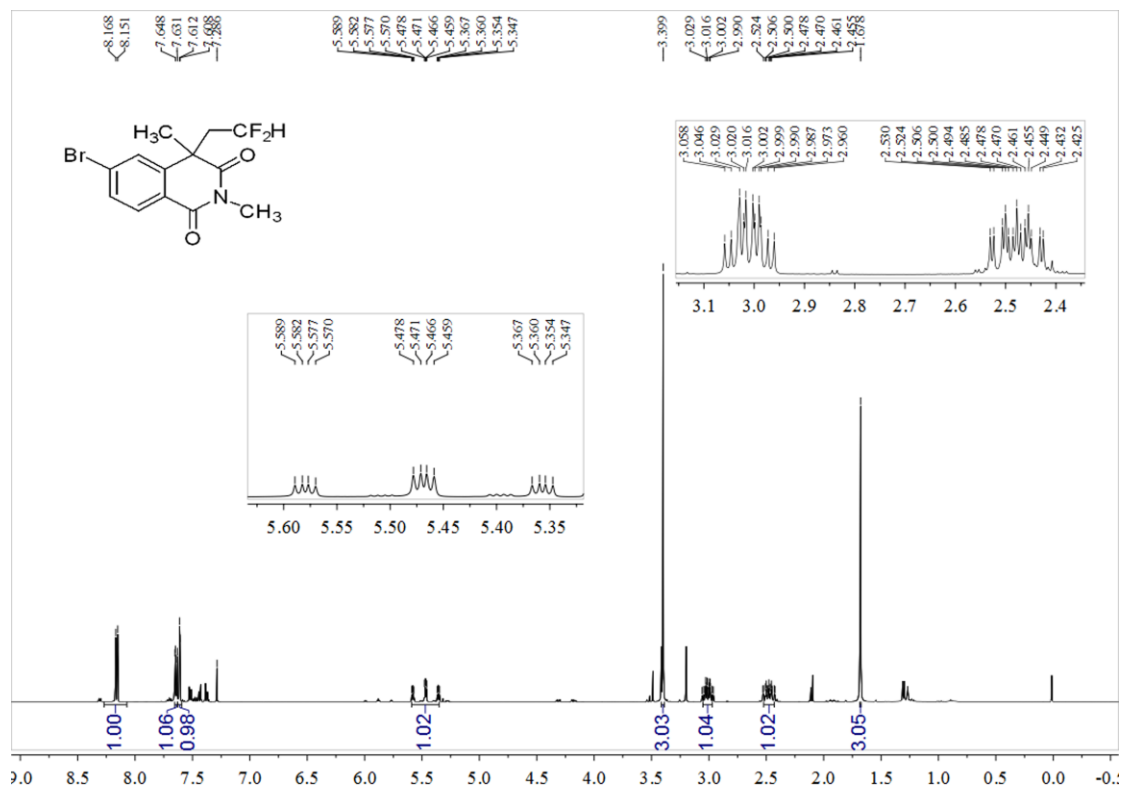

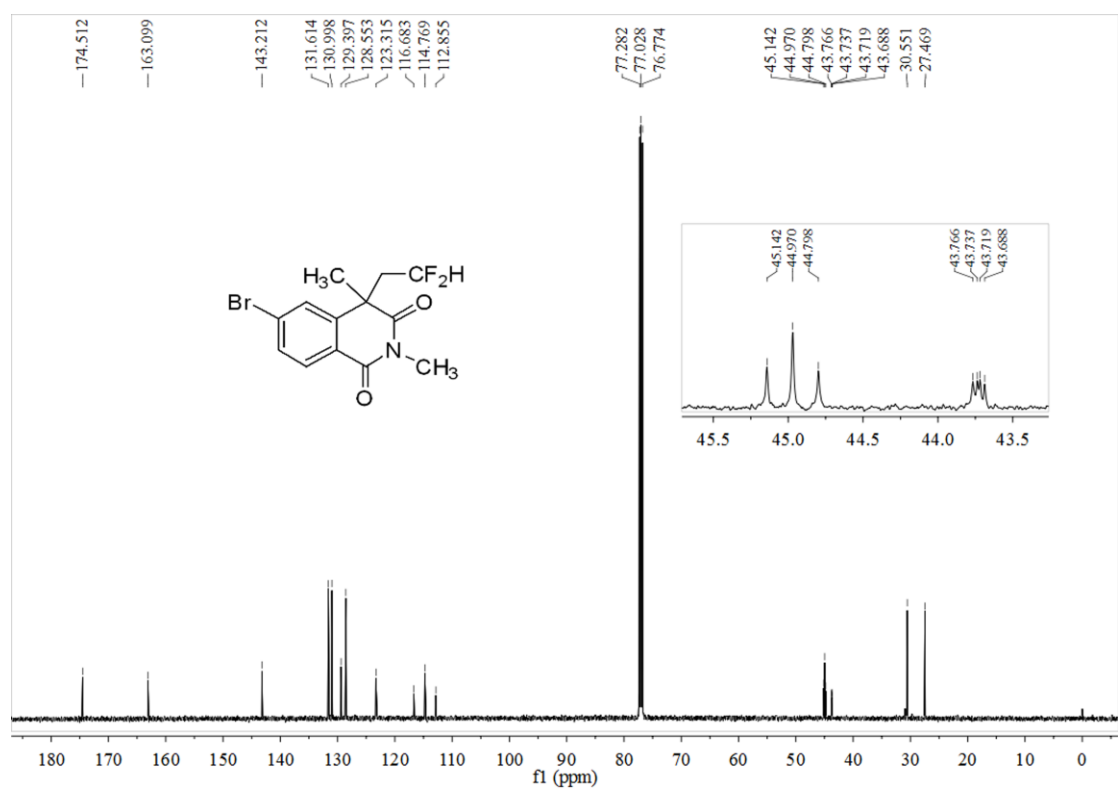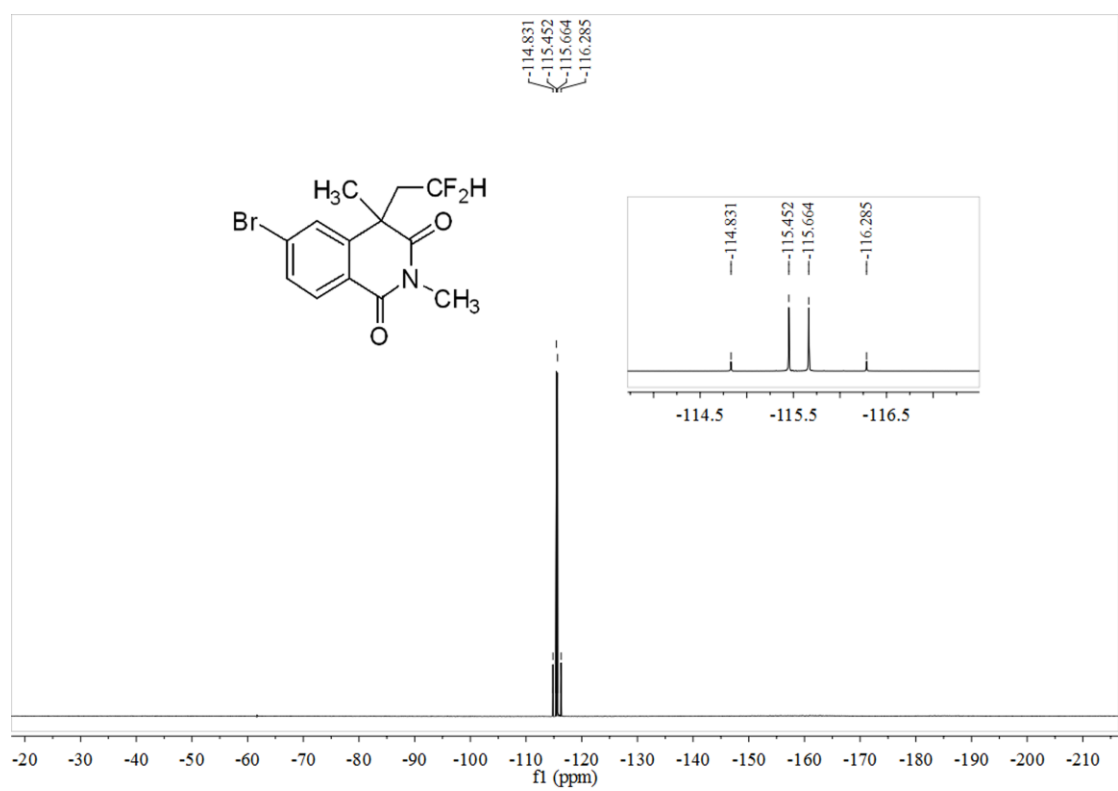

$^1\text{H}$  NMR,  $^{13}\text{C}$  NMR and  $^{19}\text{F}$  NMR spectra of compound **3g**:

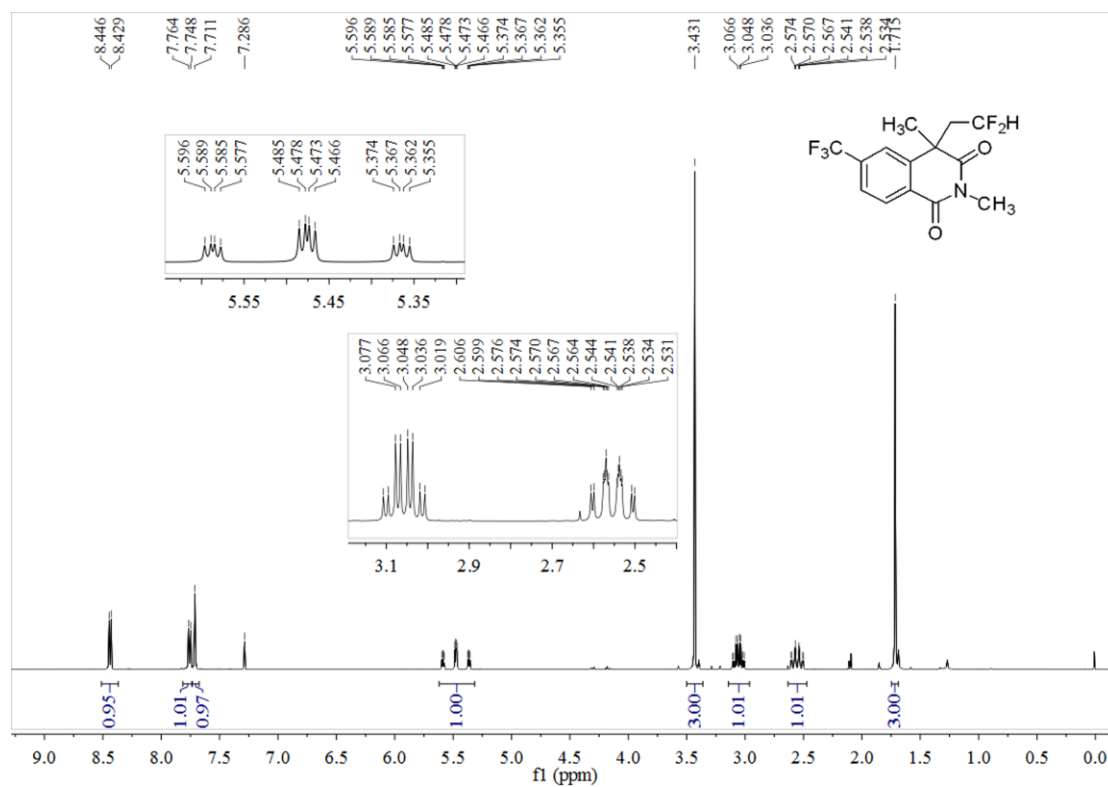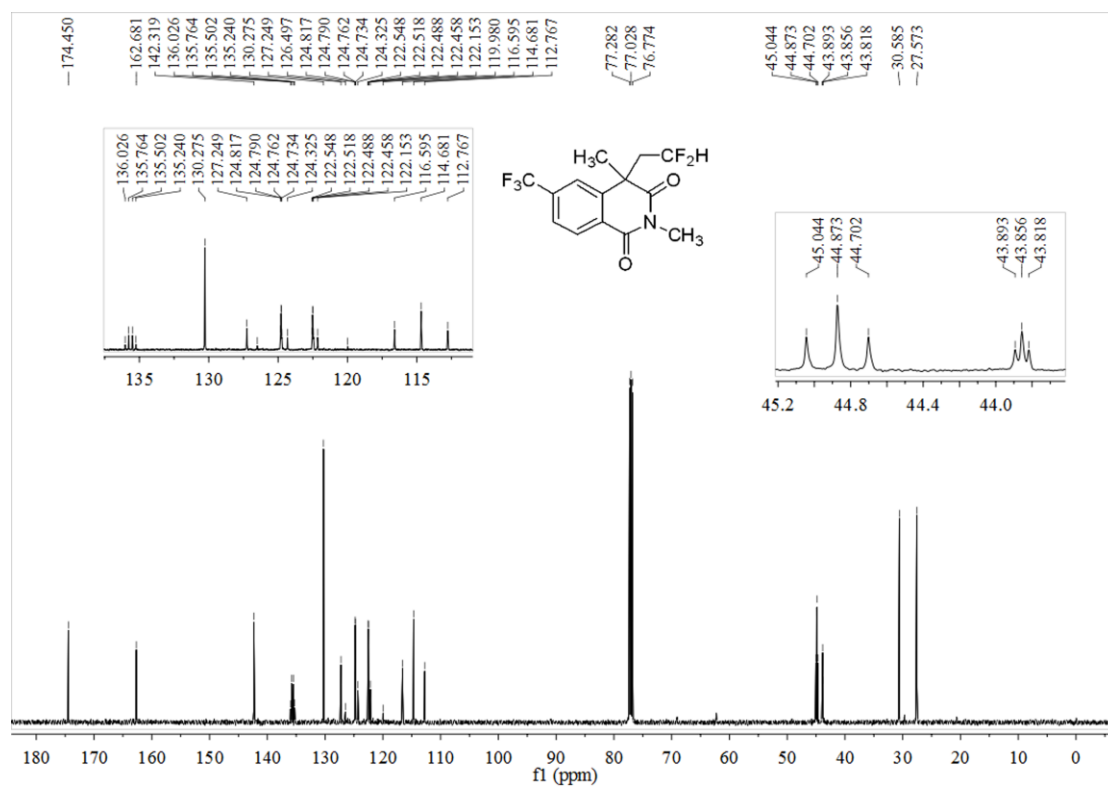

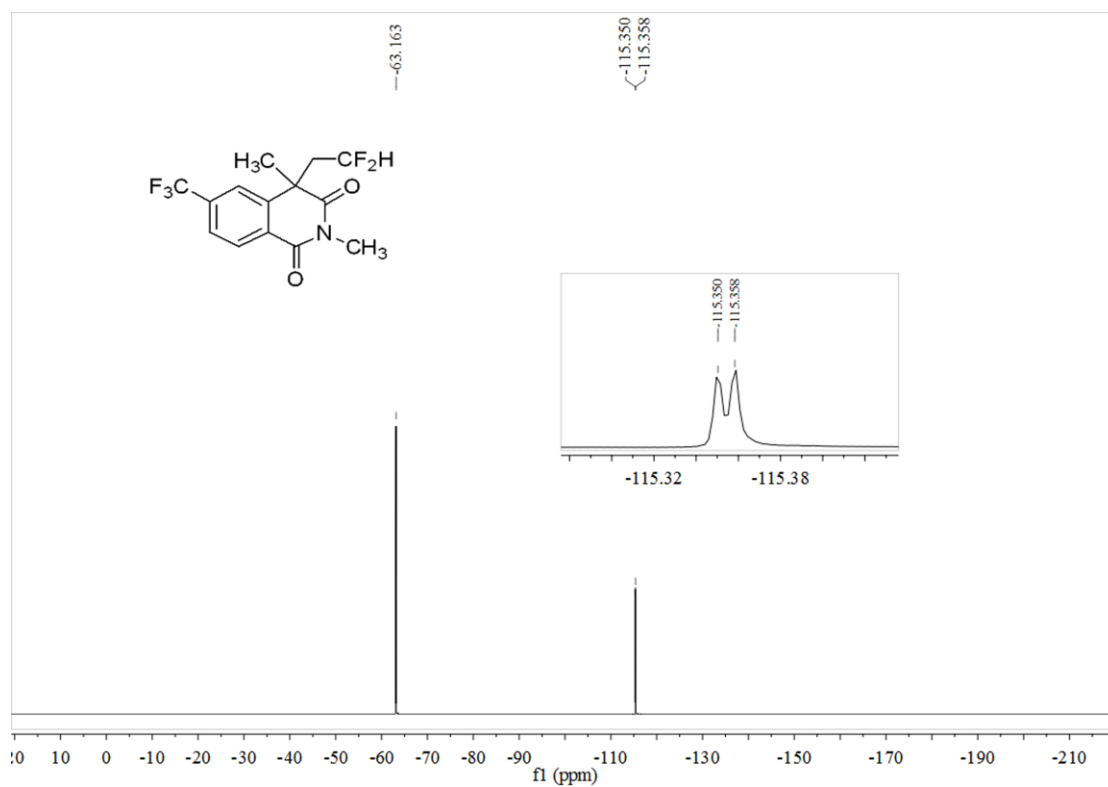

<sup>1</sup>H NMR, <sup>13</sup>C NMR and <sup>19</sup>F NMR spectra of compound **3h**:

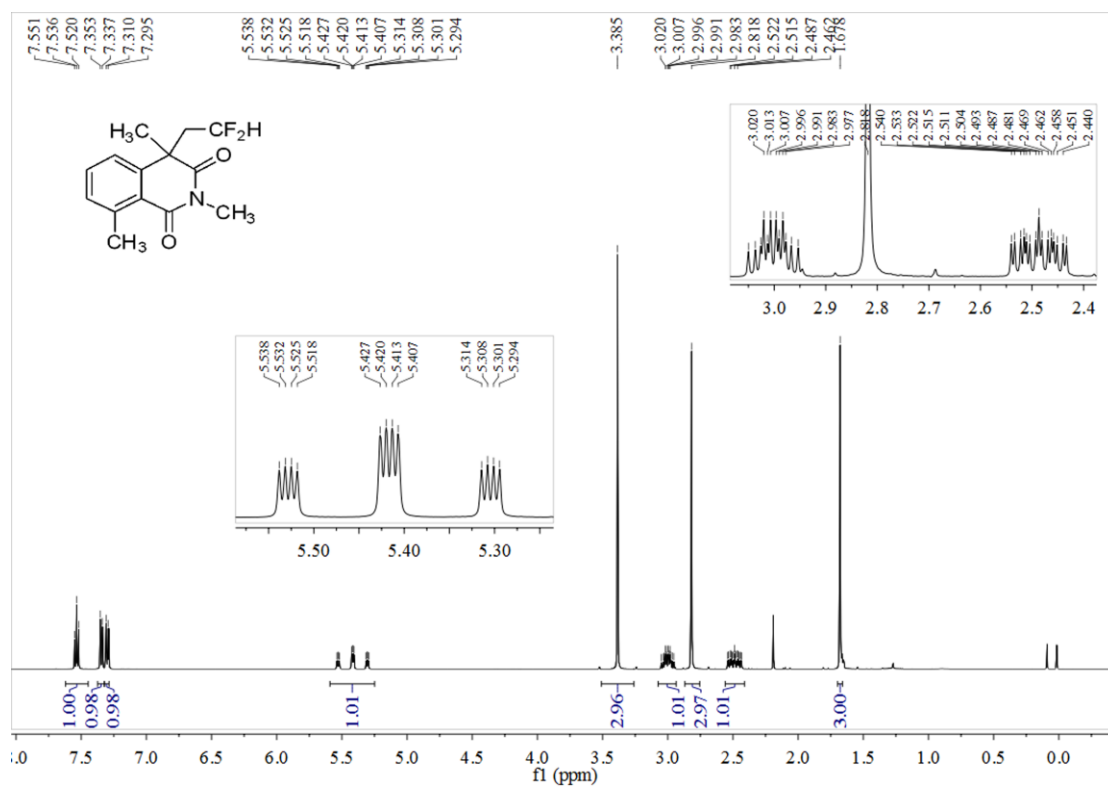

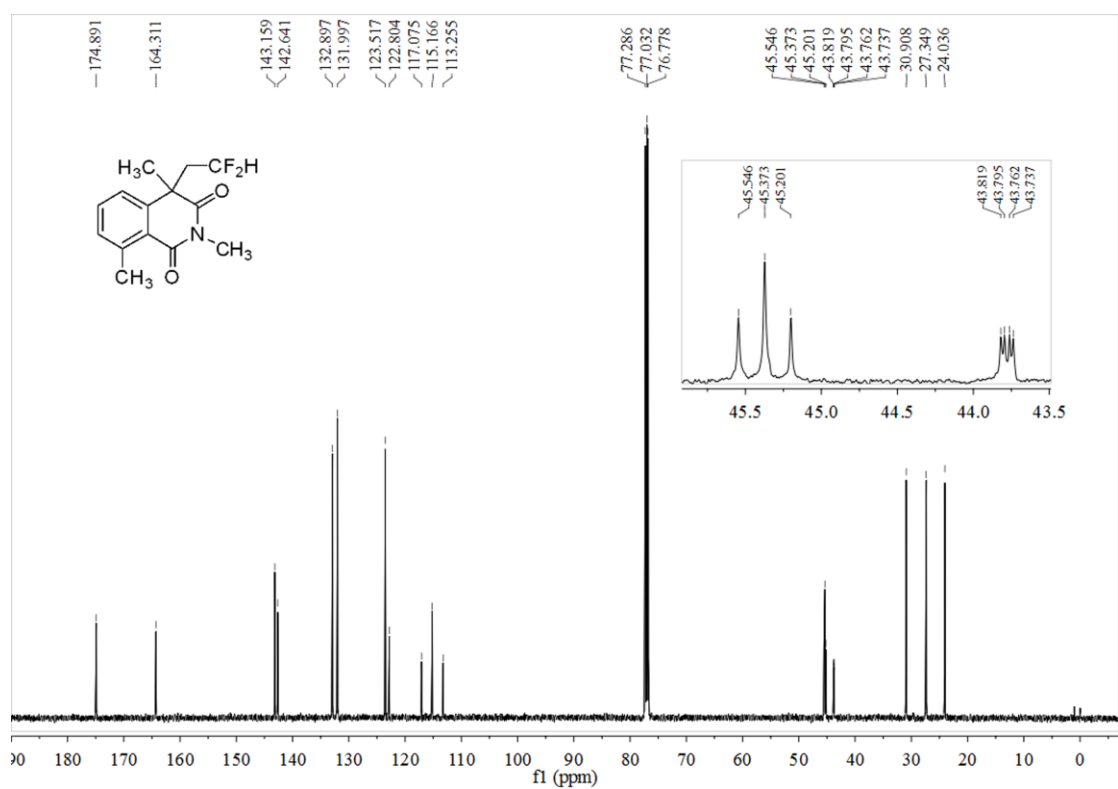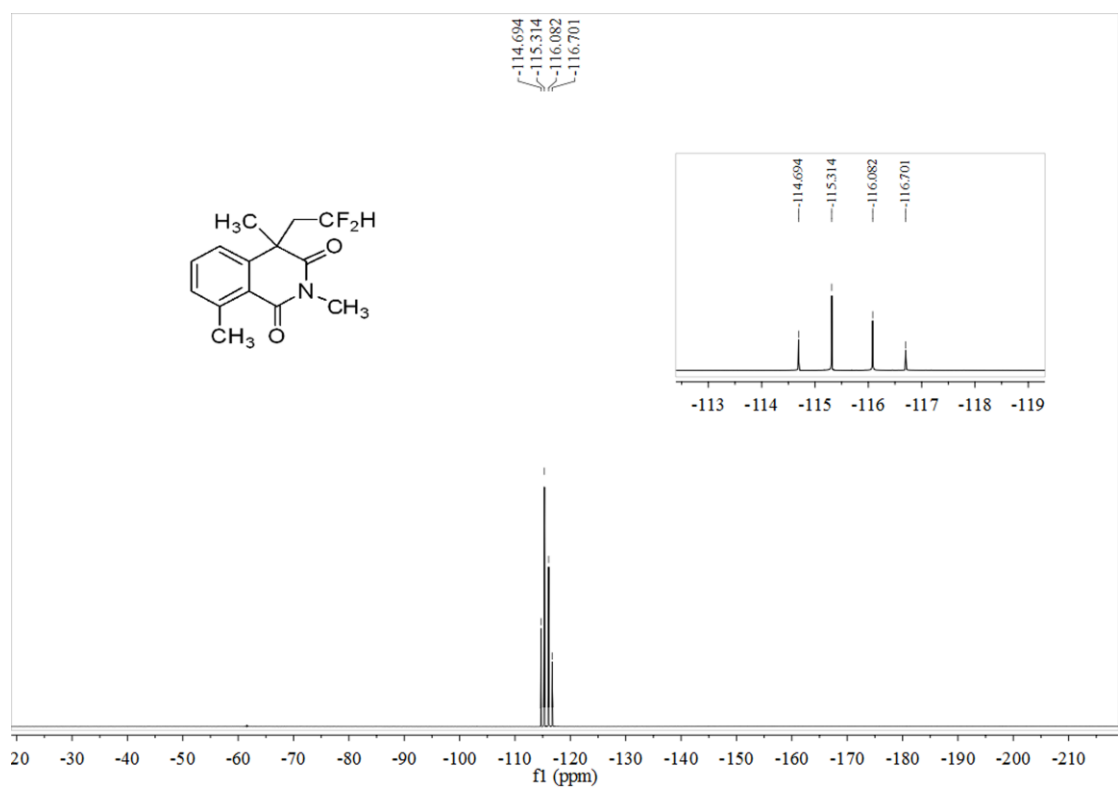

$^1\text{H}$  NMR,  $^{13}\text{C}$  NMR and  $^{19}\text{F}$  NMR spectra of compound **3i** and **3i'**:

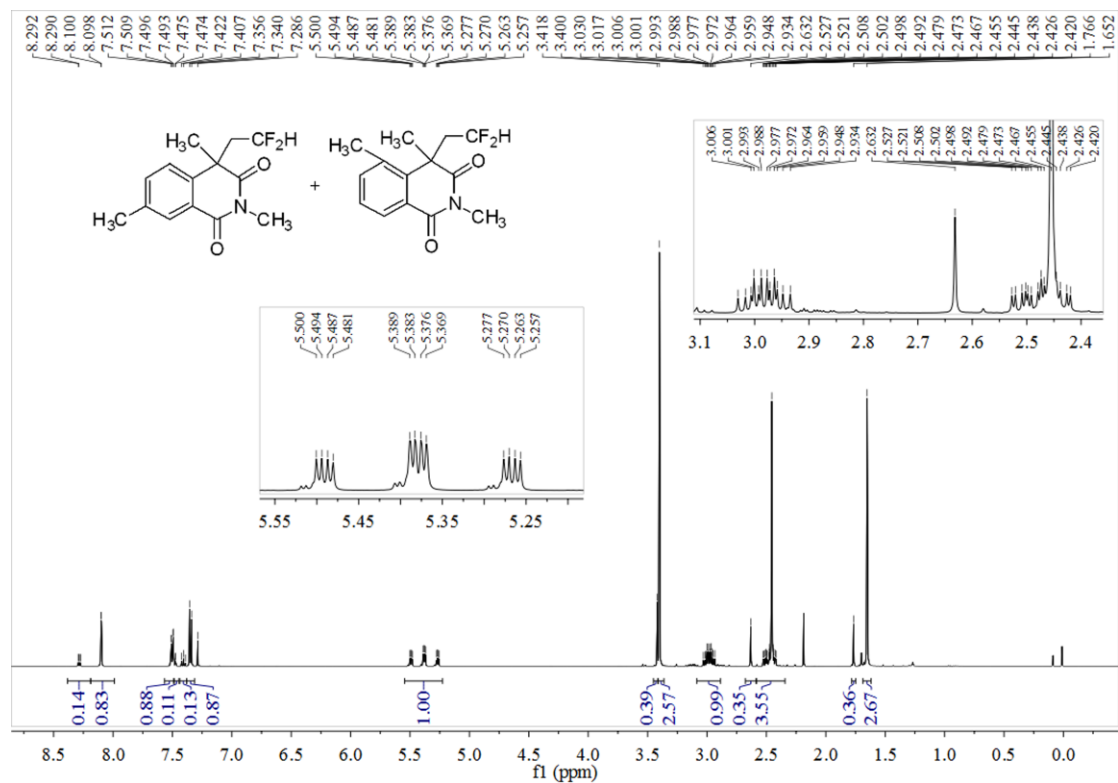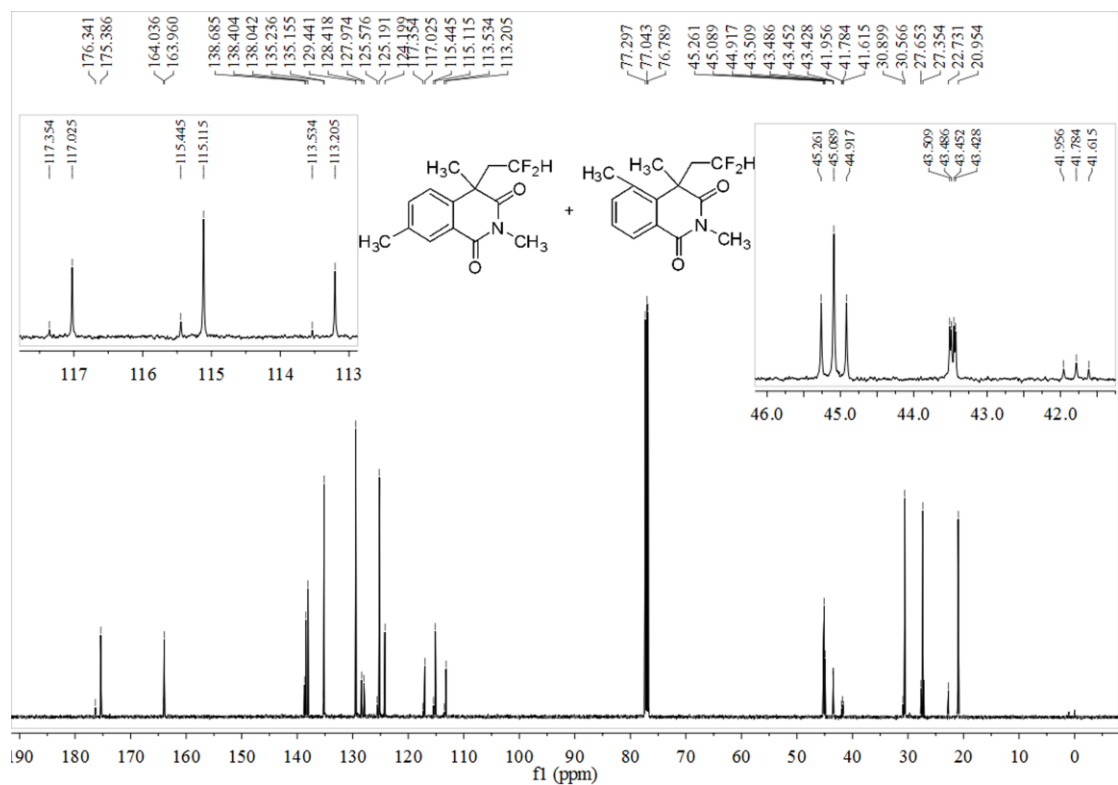

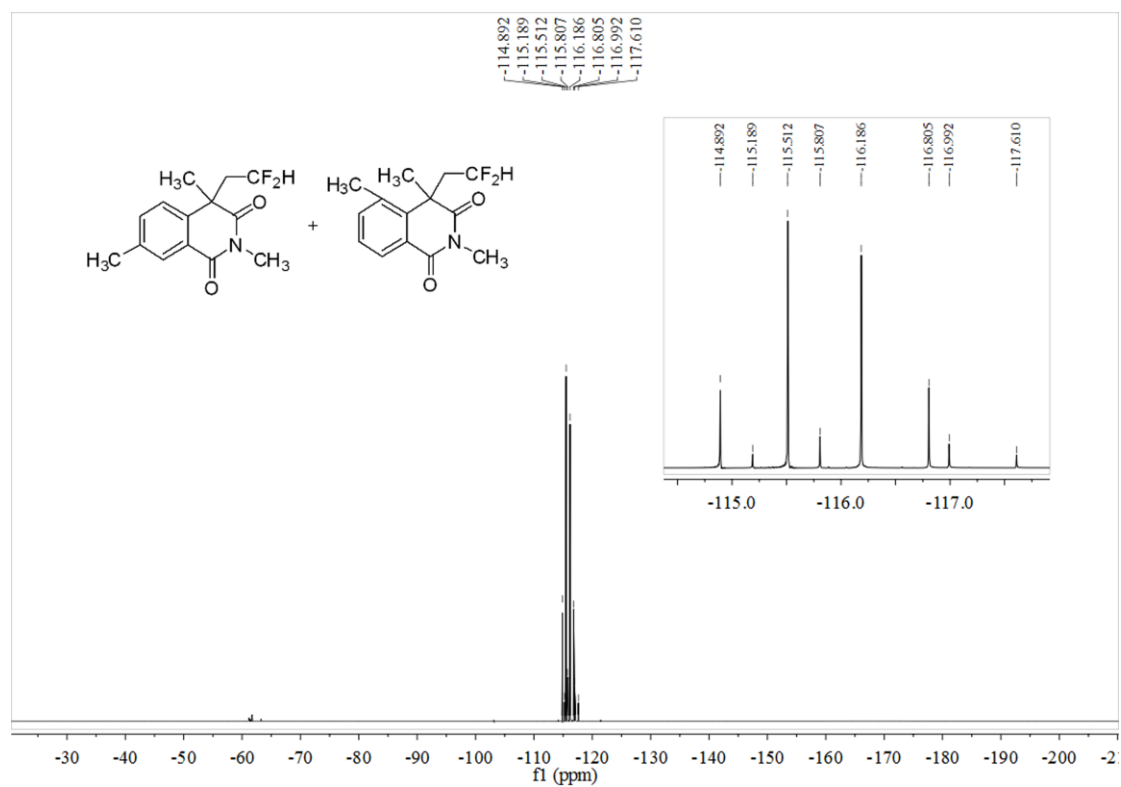

$^1\text{H}$  NMR,  $^{13}\text{C}$  NMR and  $^{19}\text{F}$  NMR spectra of compound **3j** :

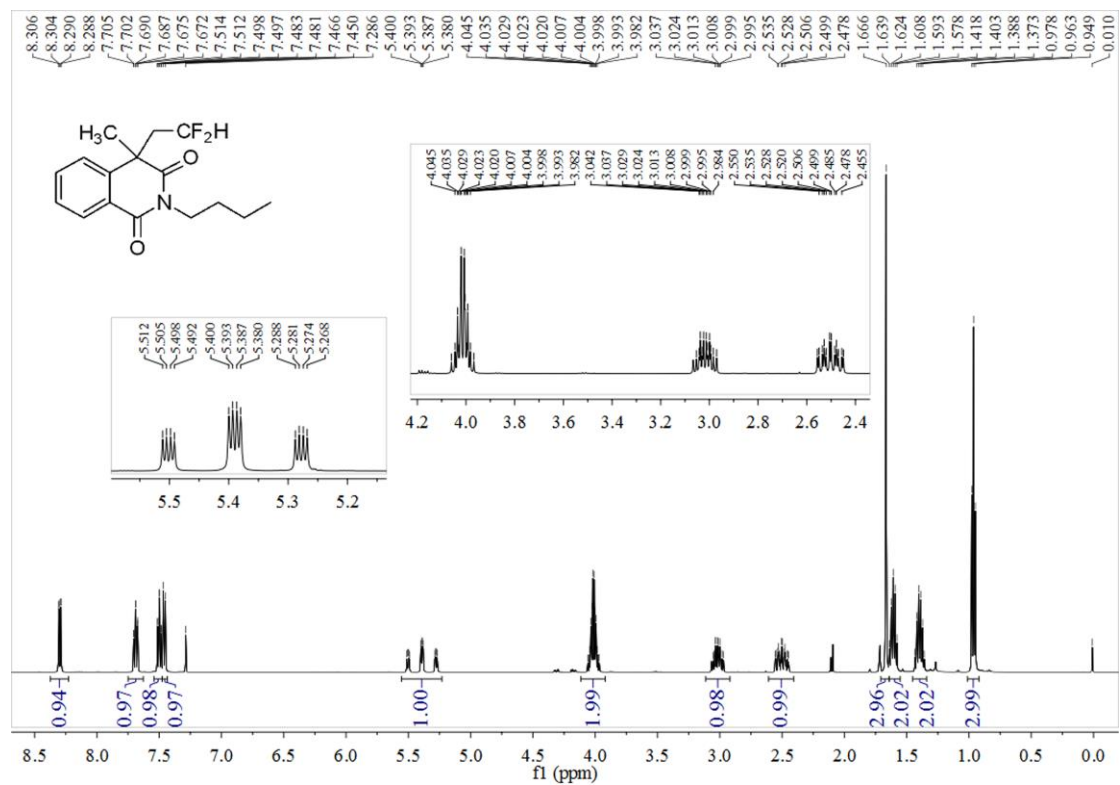



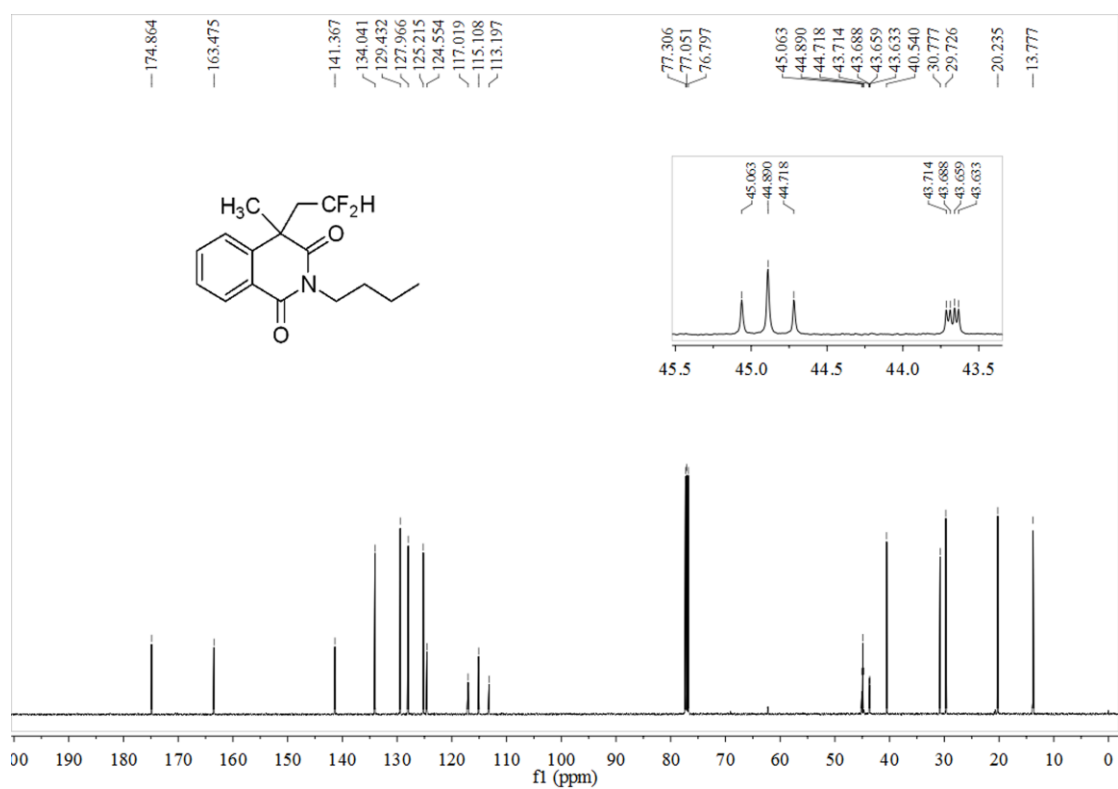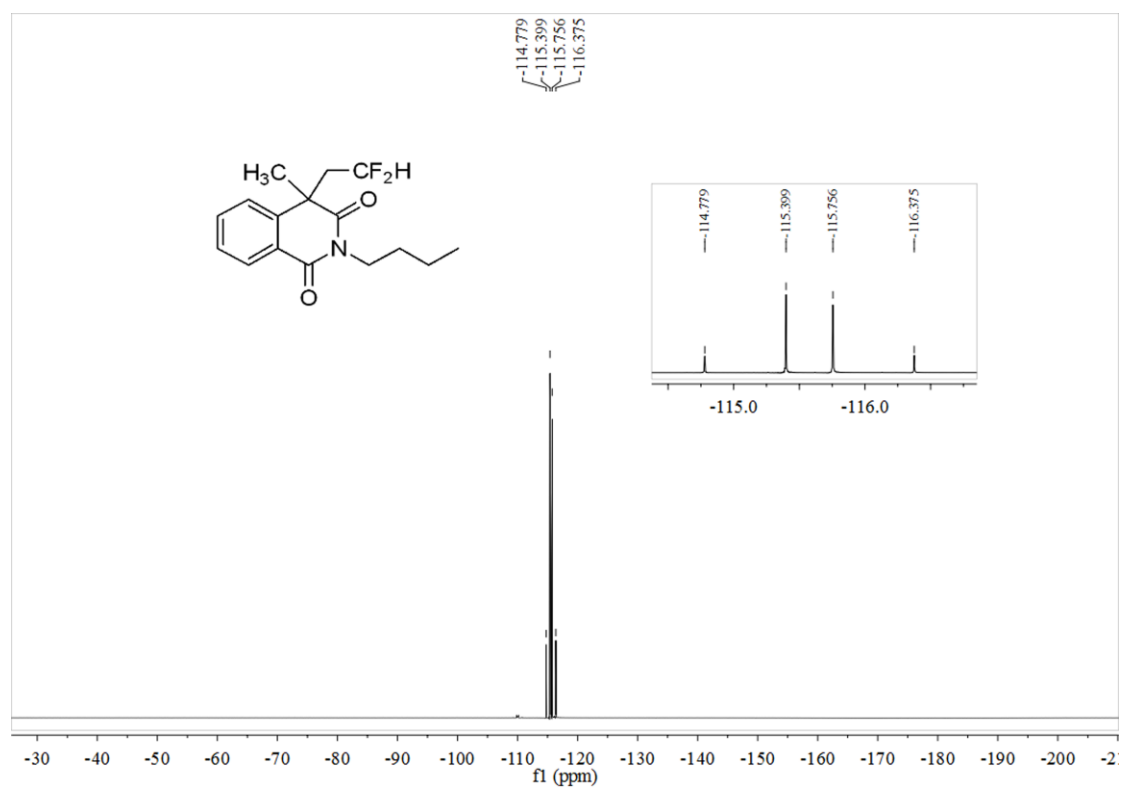

$^1\text{H}$  NMR,  $^{13}\text{C}$  NMR and  $^{19}\text{F}$  NMR spectra of compound **3k** :

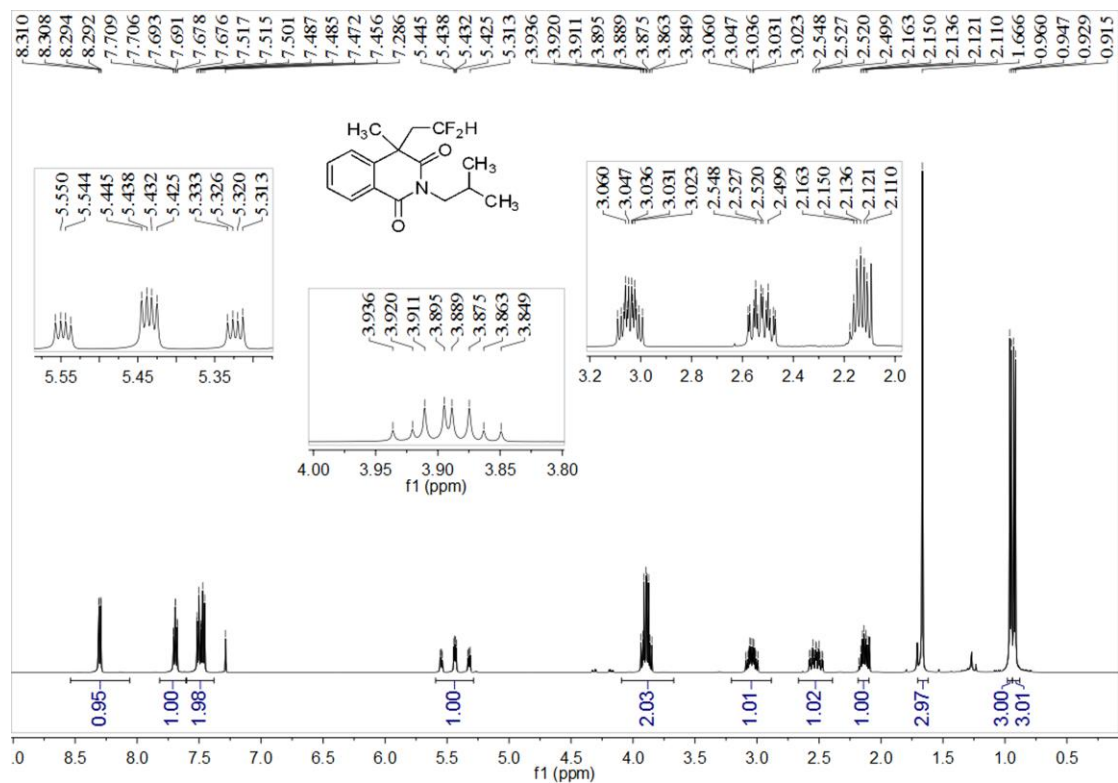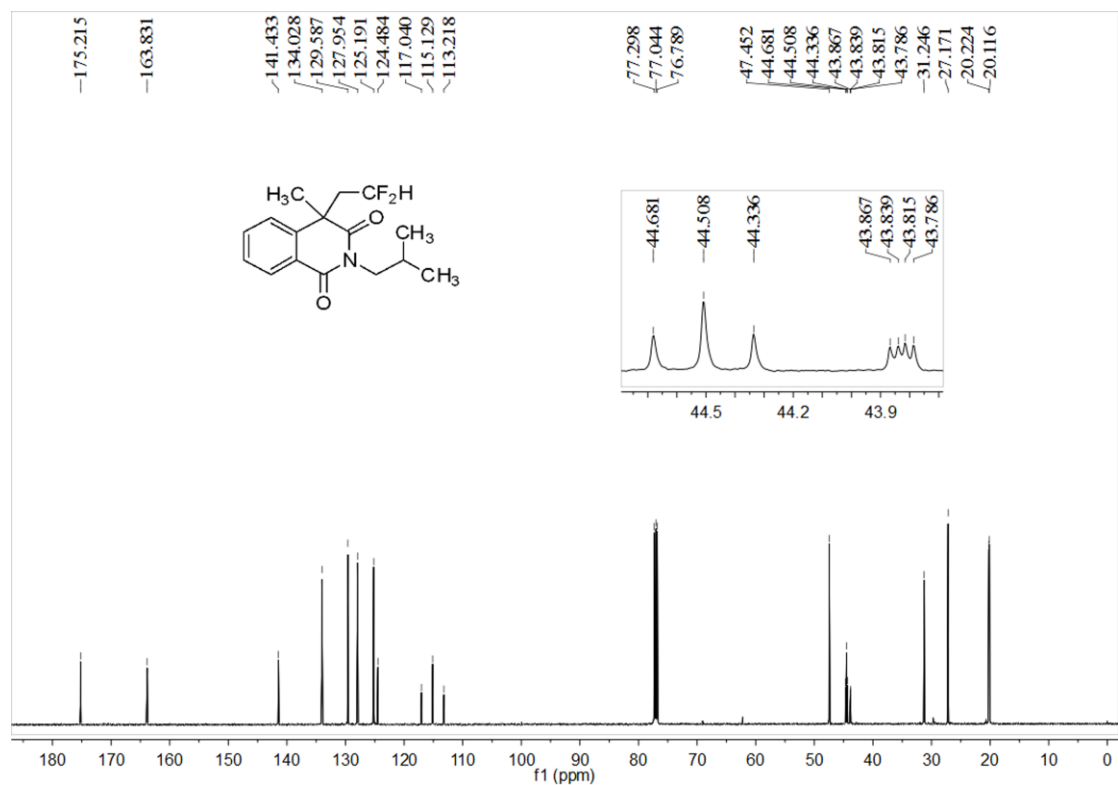

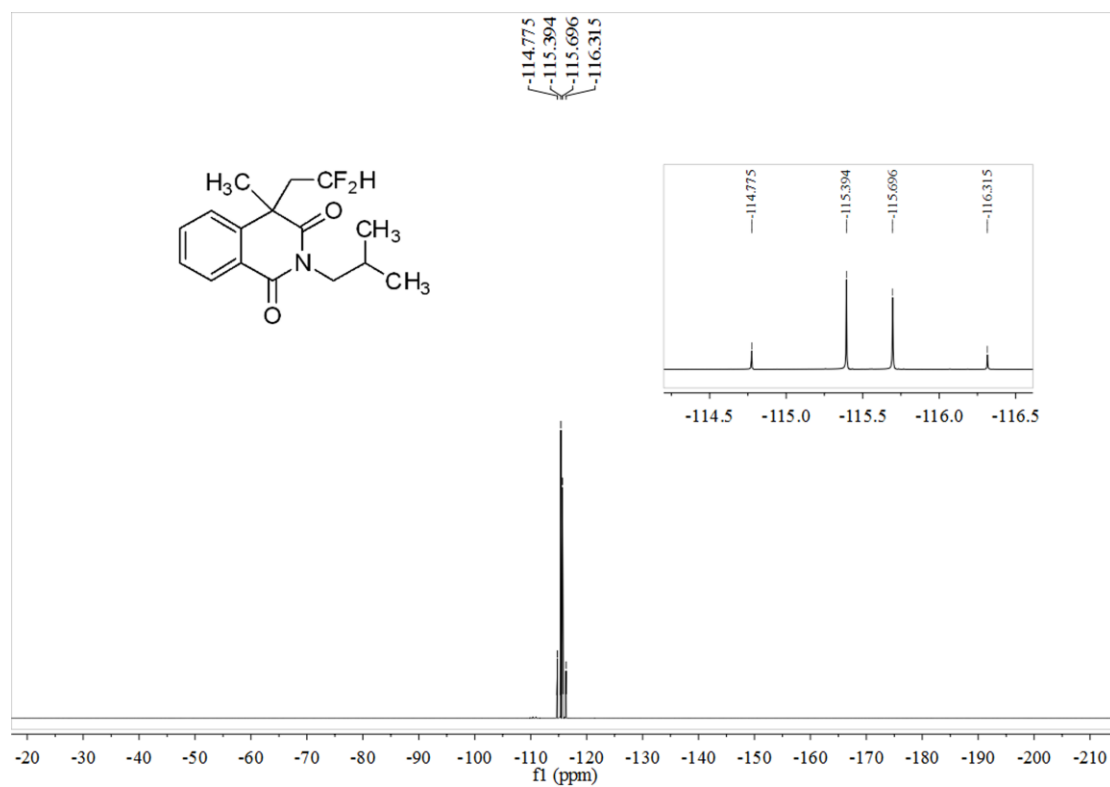

<sup>1</sup>H NMR, <sup>13</sup>C NMR and <sup>19</sup>F NMR spectra of compound **5a** :

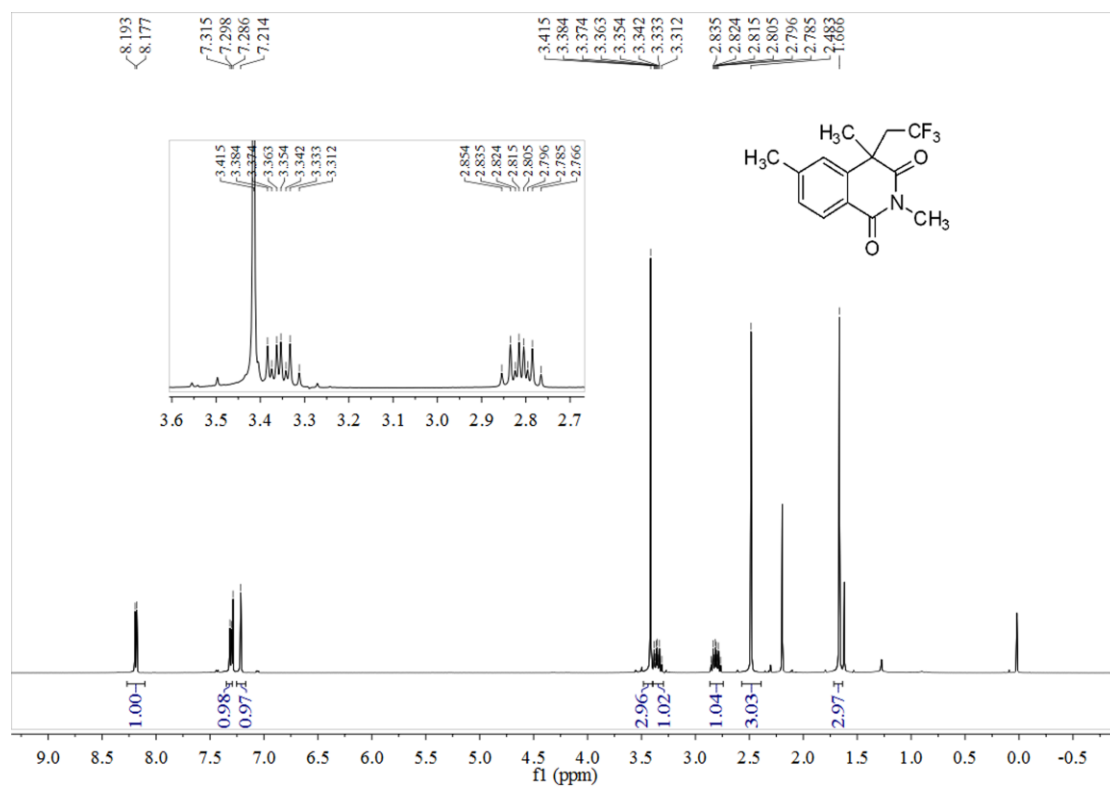

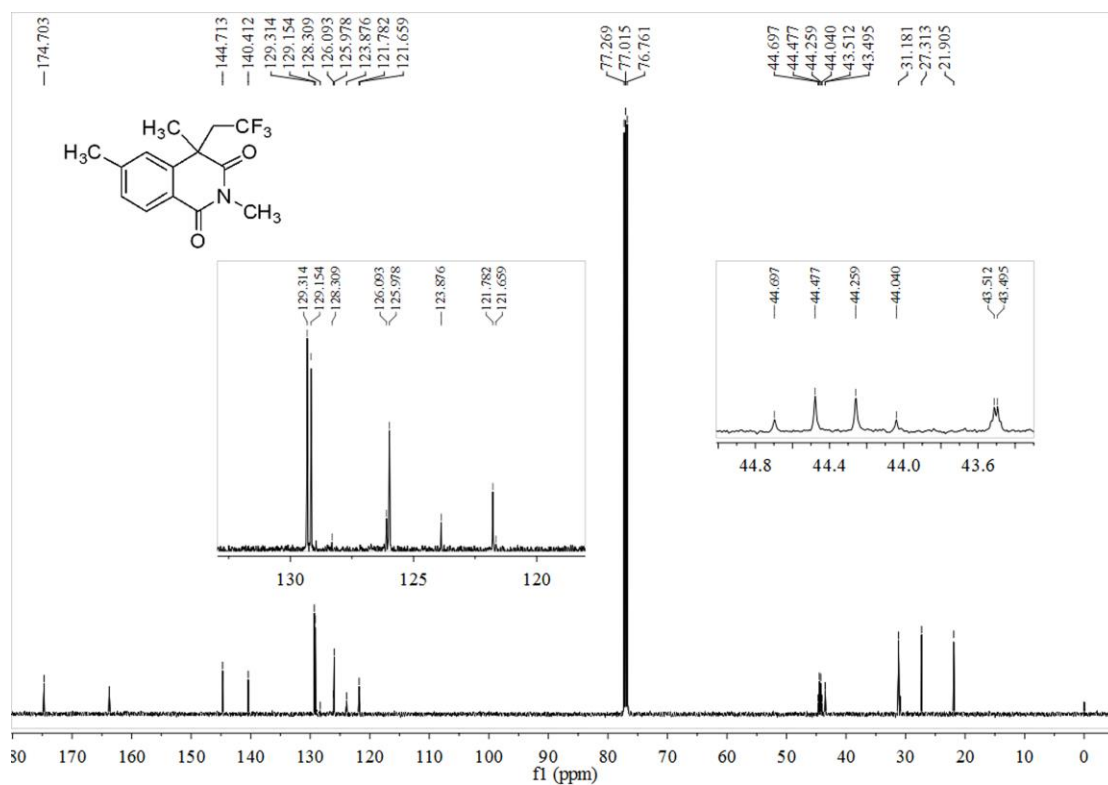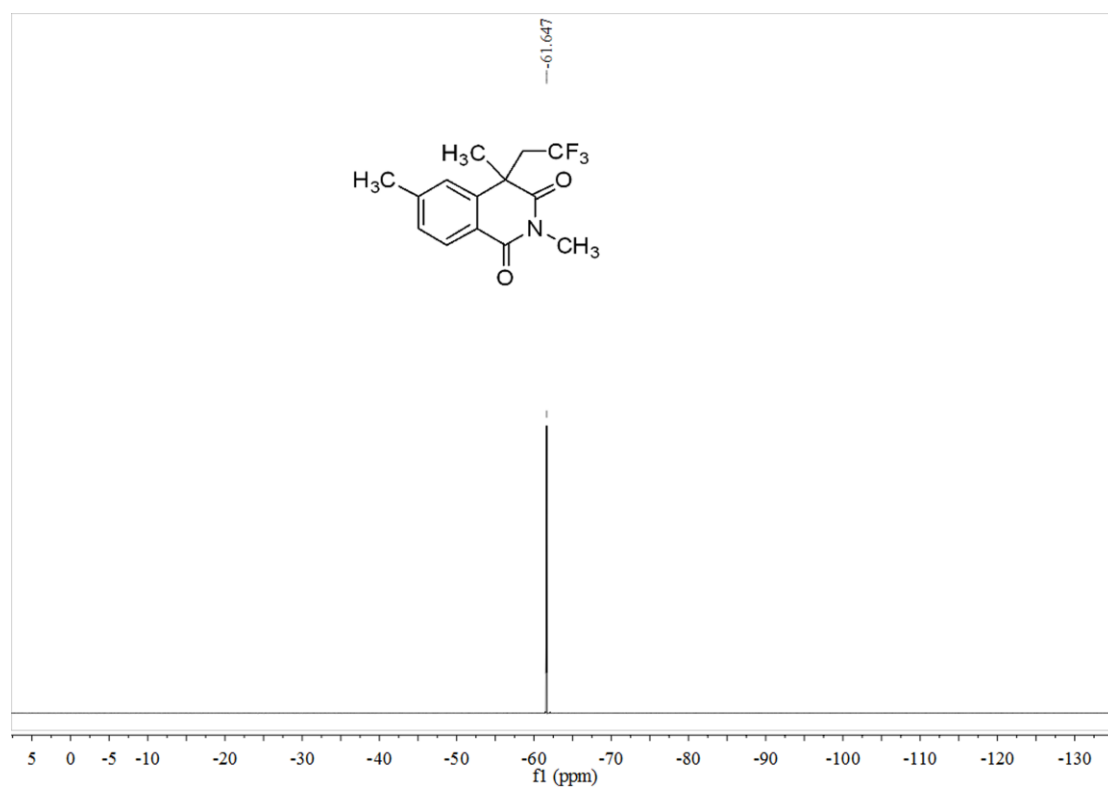

$^1\text{H}$  NMR,  $^{13}\text{C}$  NMR and  $^{19}\text{F}$  NMR spectra of compound **5b** :

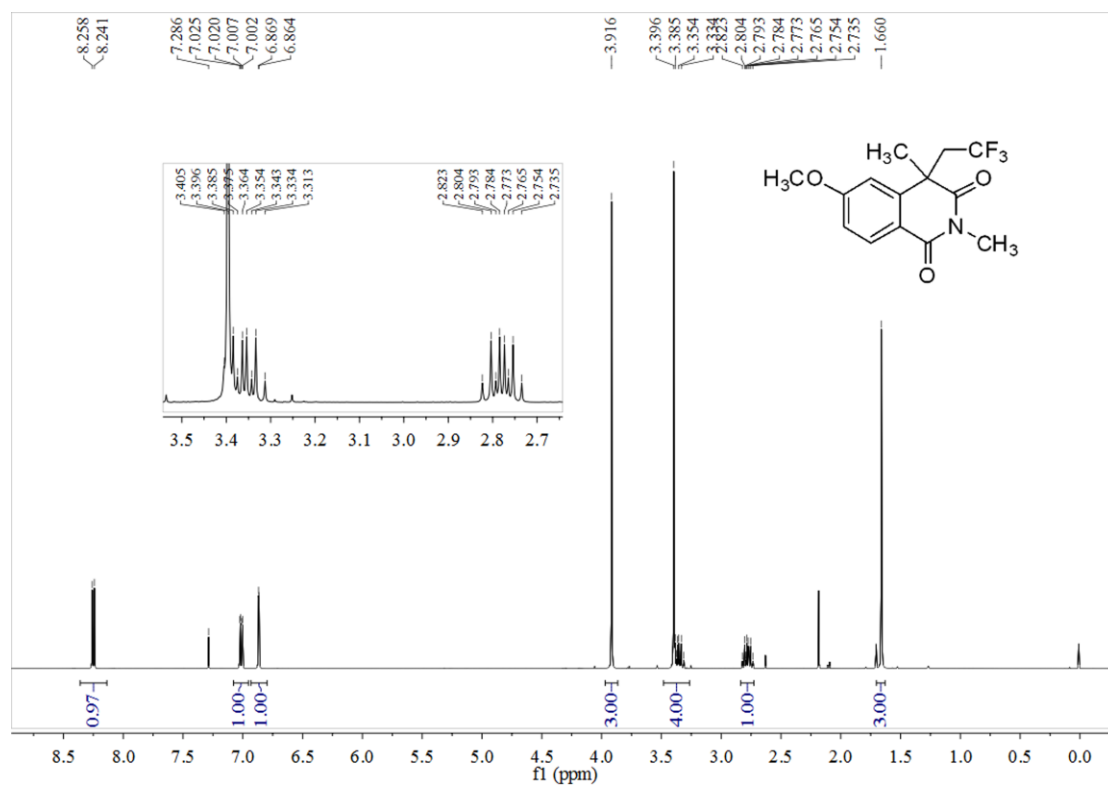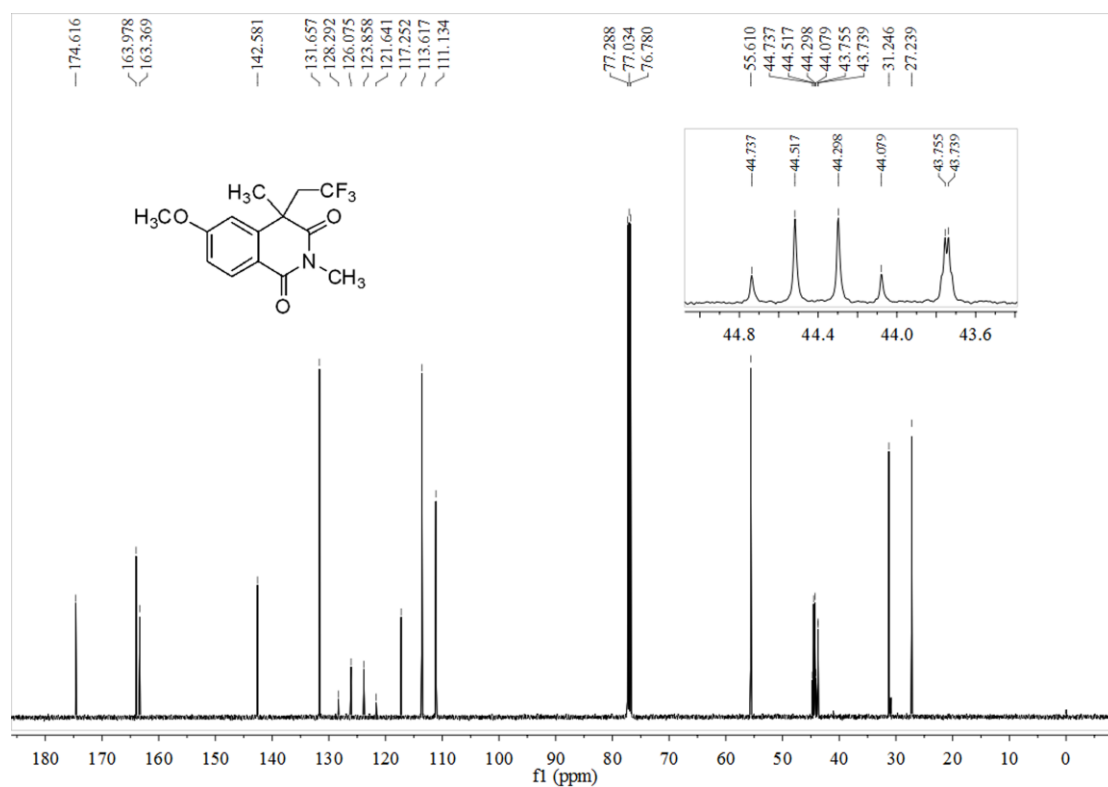

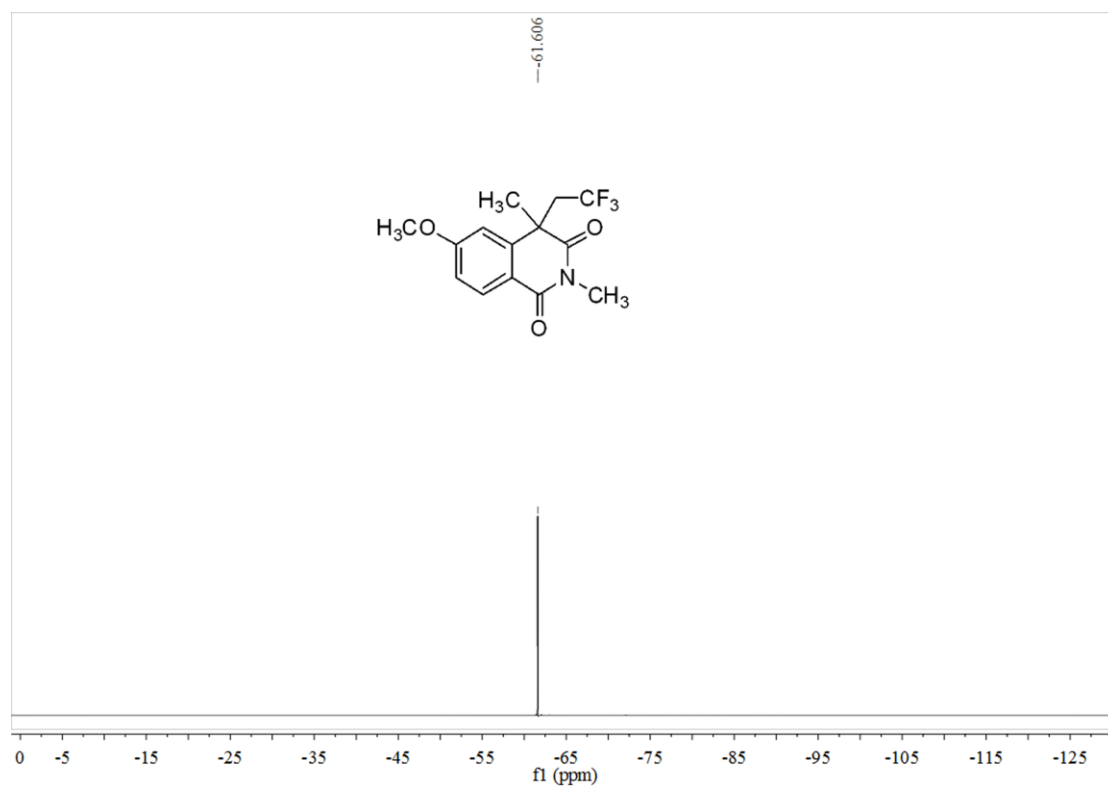

$^1\text{H}$  NMR,  $^{13}\text{C}$  NMR and  $^{19}\text{F}$  NMR spectra of compound **5c** :

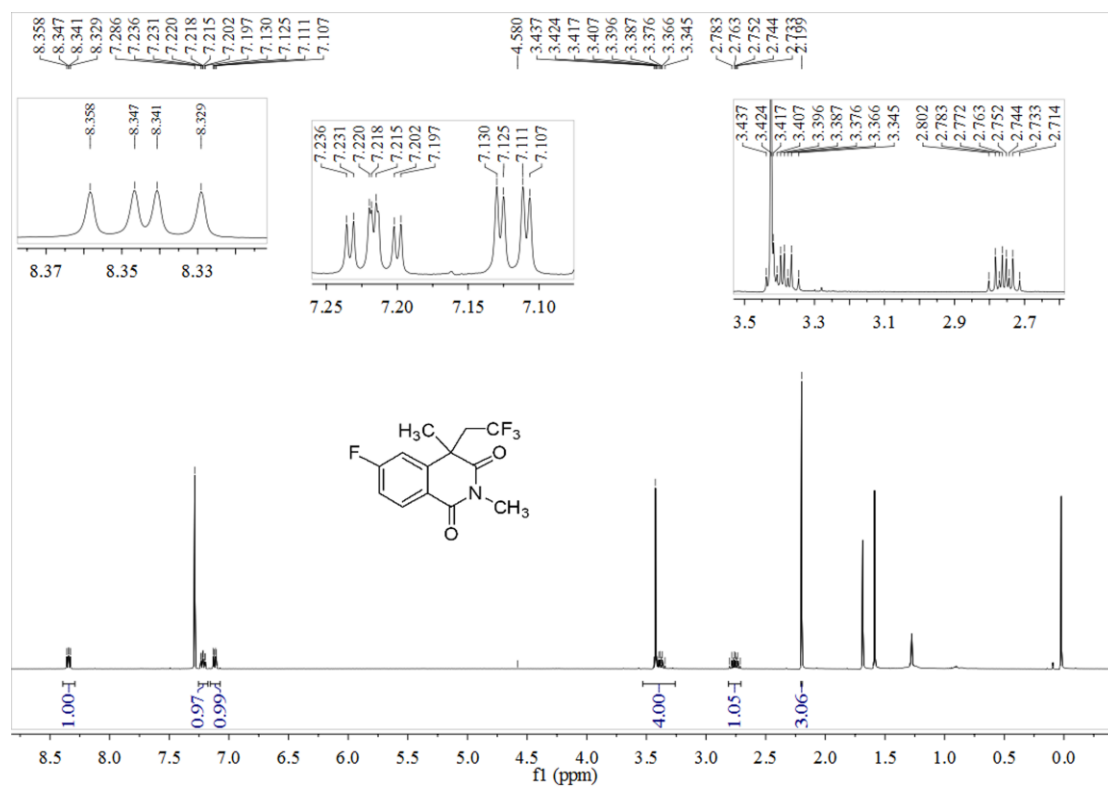

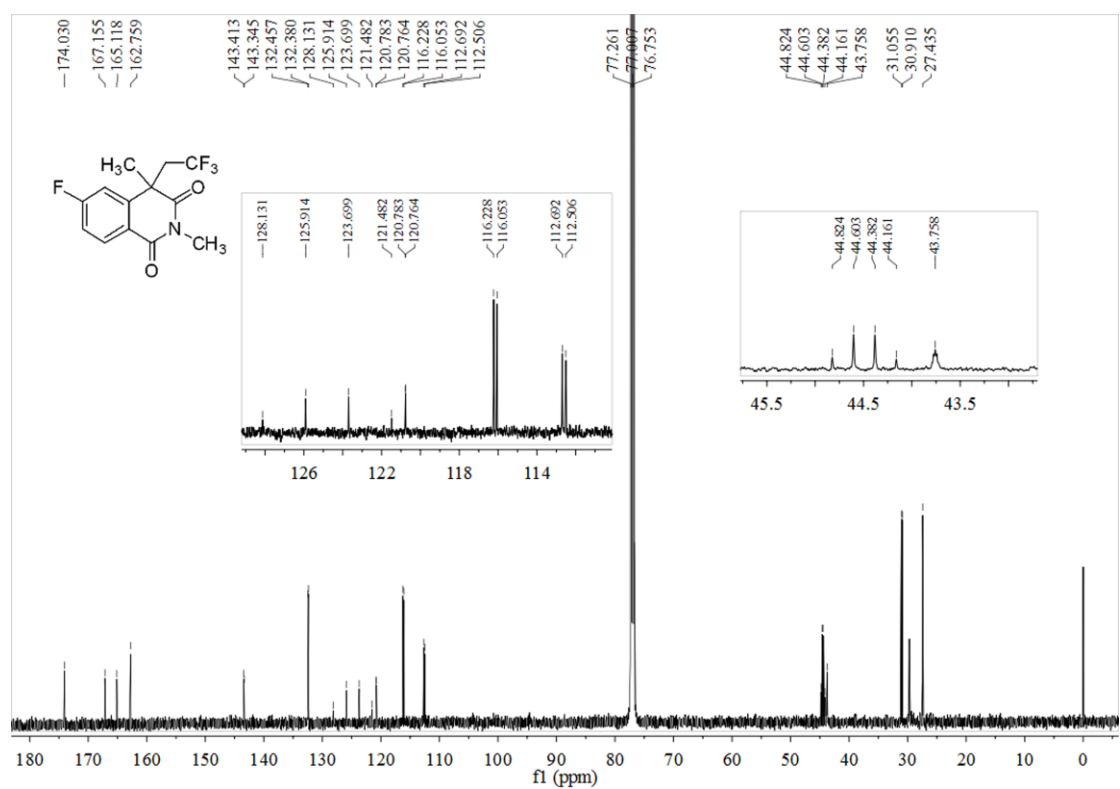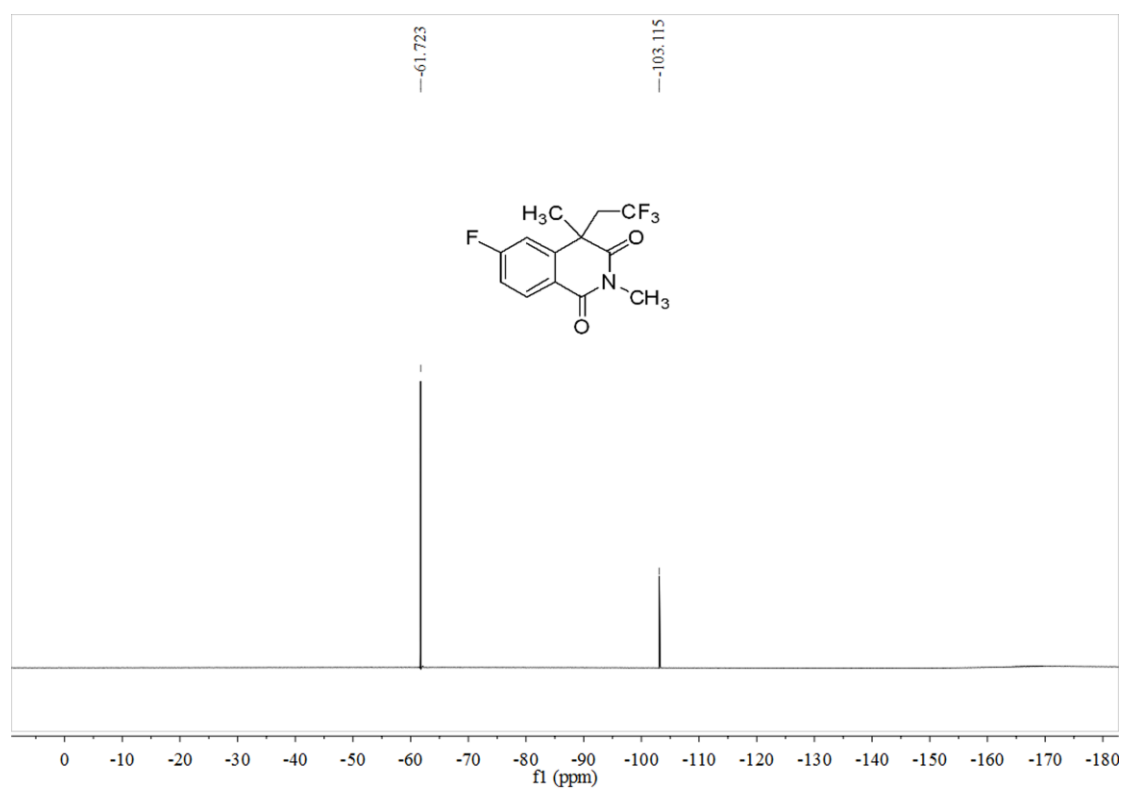

$^1\text{H}$  NMR,  $^{13}\text{C}$  NMR and  $^{19}\text{F}$  NMR spectra of compound **5d** :

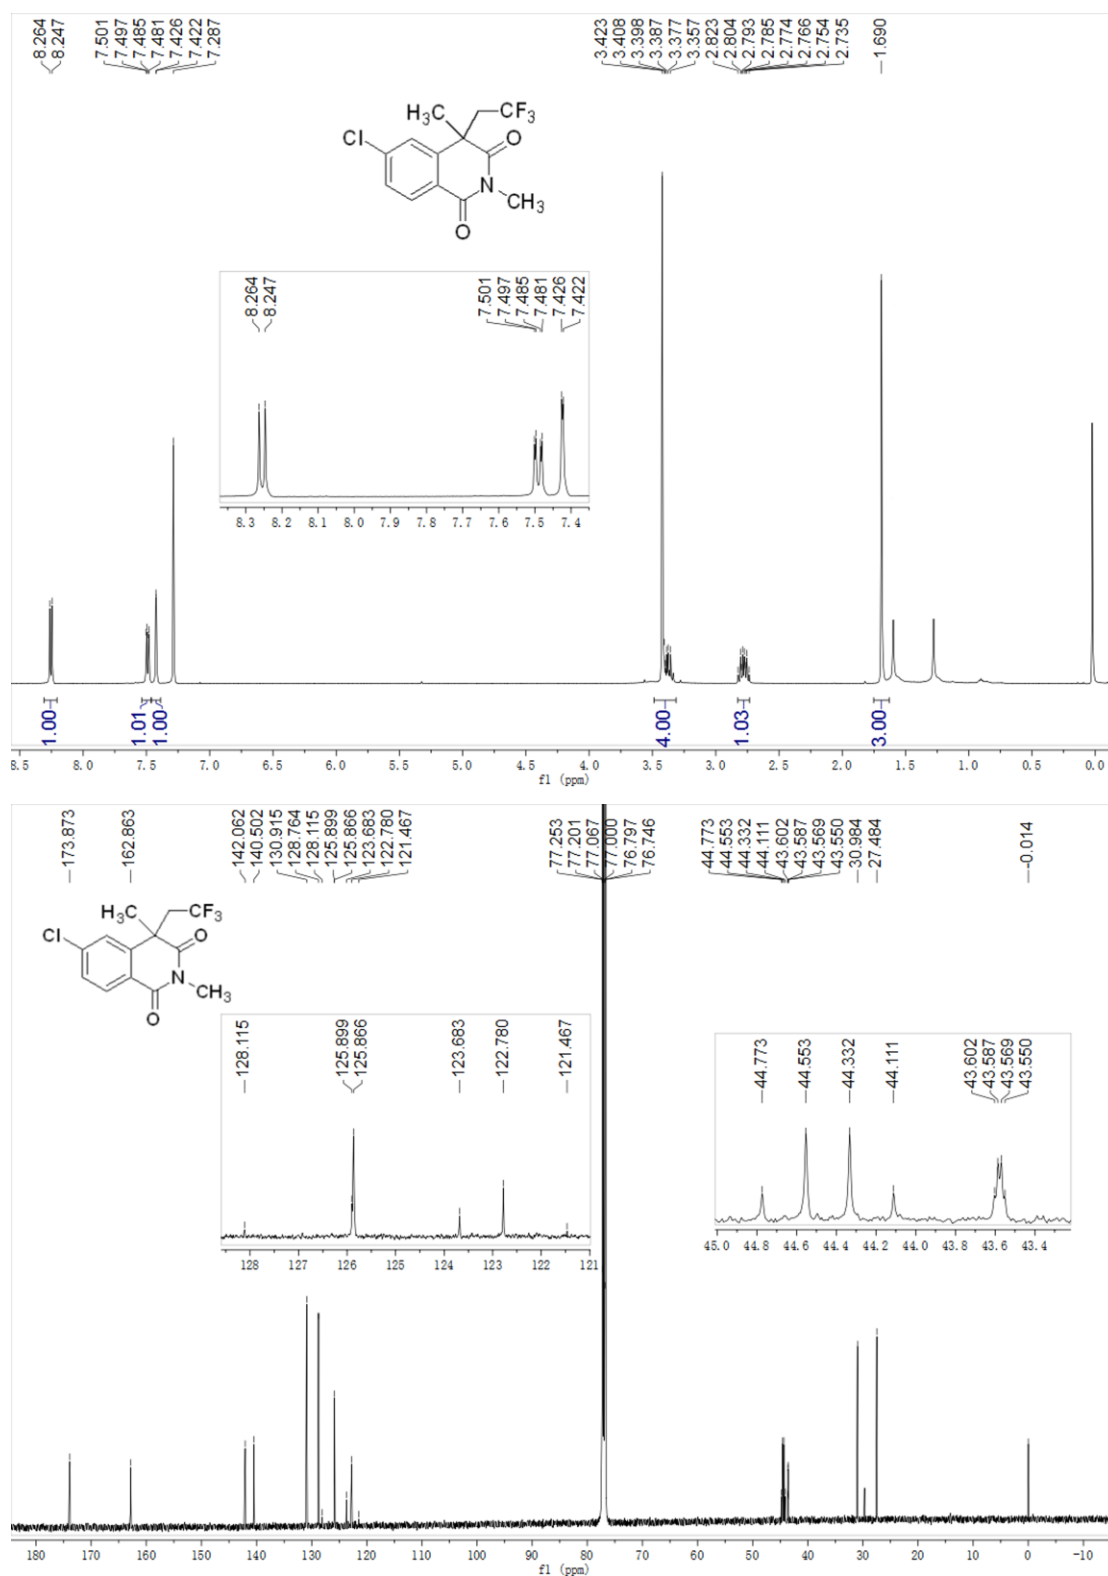



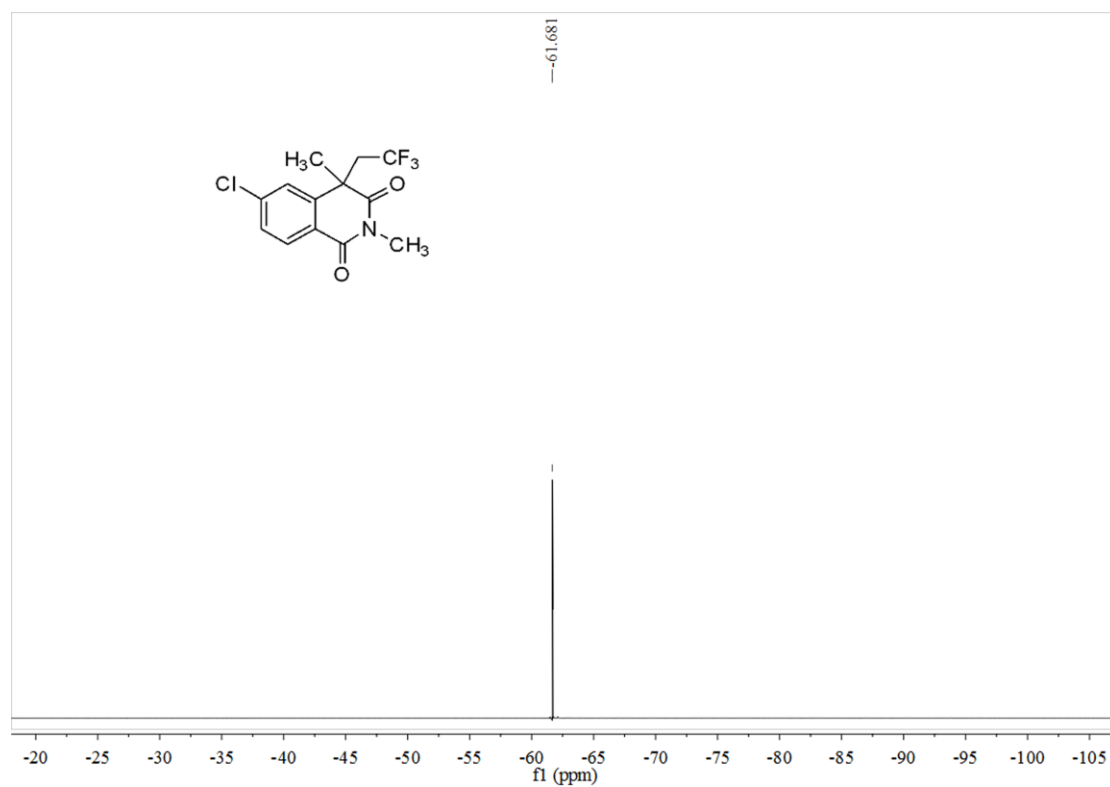

$^1\text{H}$  NMR,  $^{13}\text{C}$  NMR and  $^{19}\text{F}$  NMR spectra of compound **5e** :

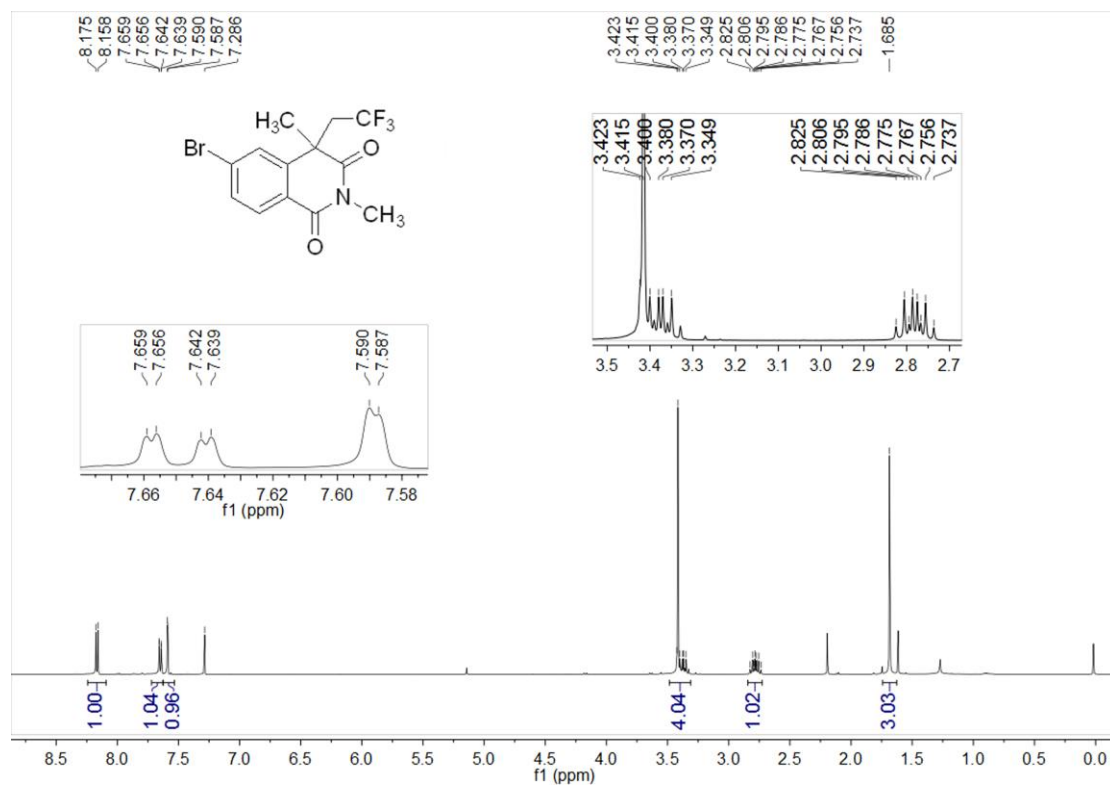

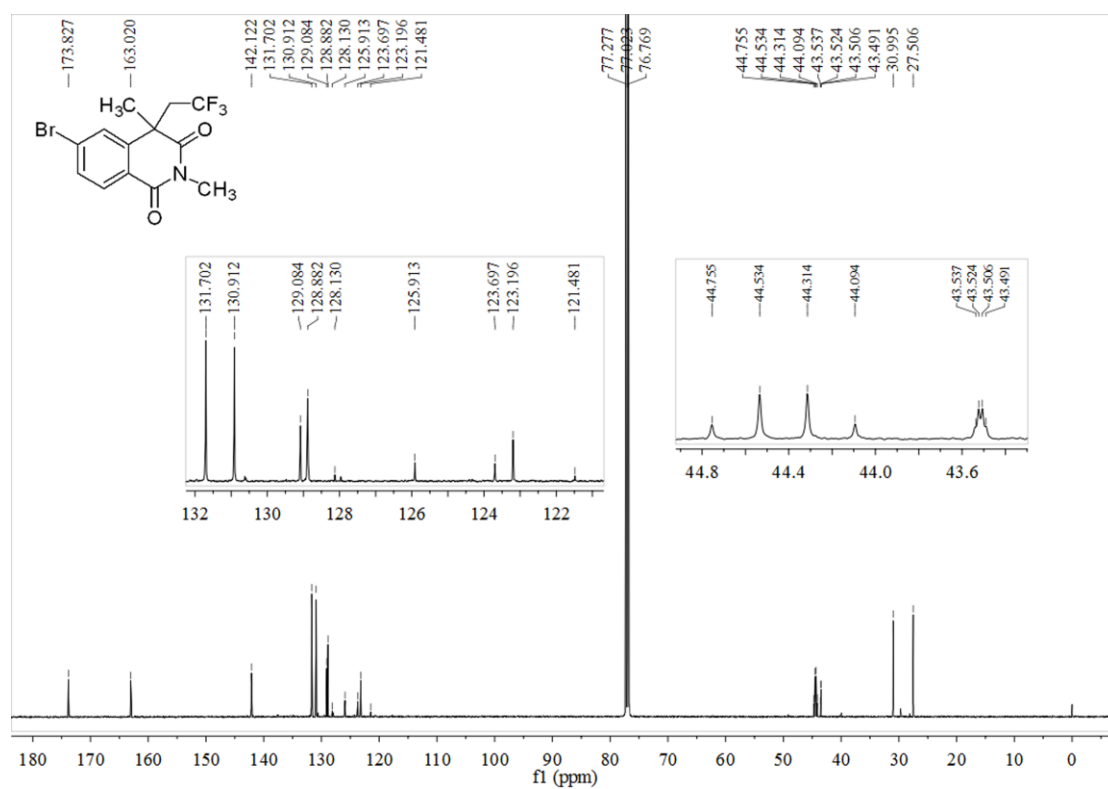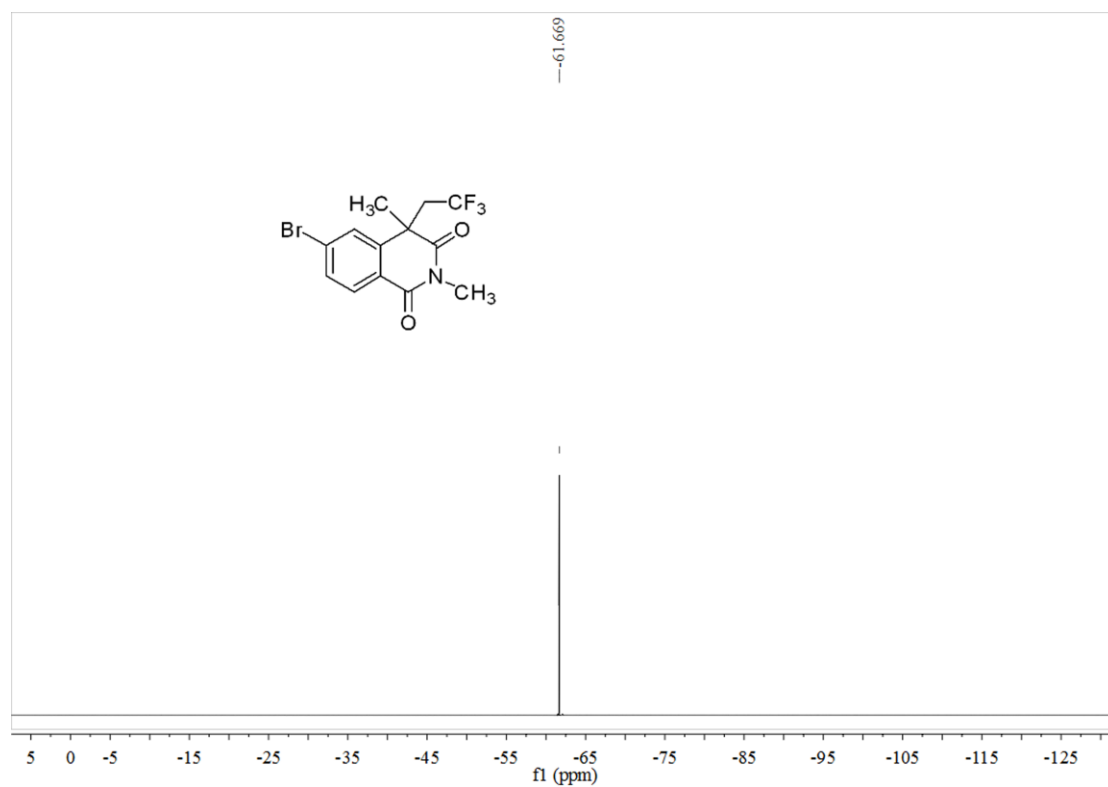

<sup>1</sup>H NMR, <sup>13</sup>C NMR and <sup>19</sup>F NMR spectra of compound **5f** :

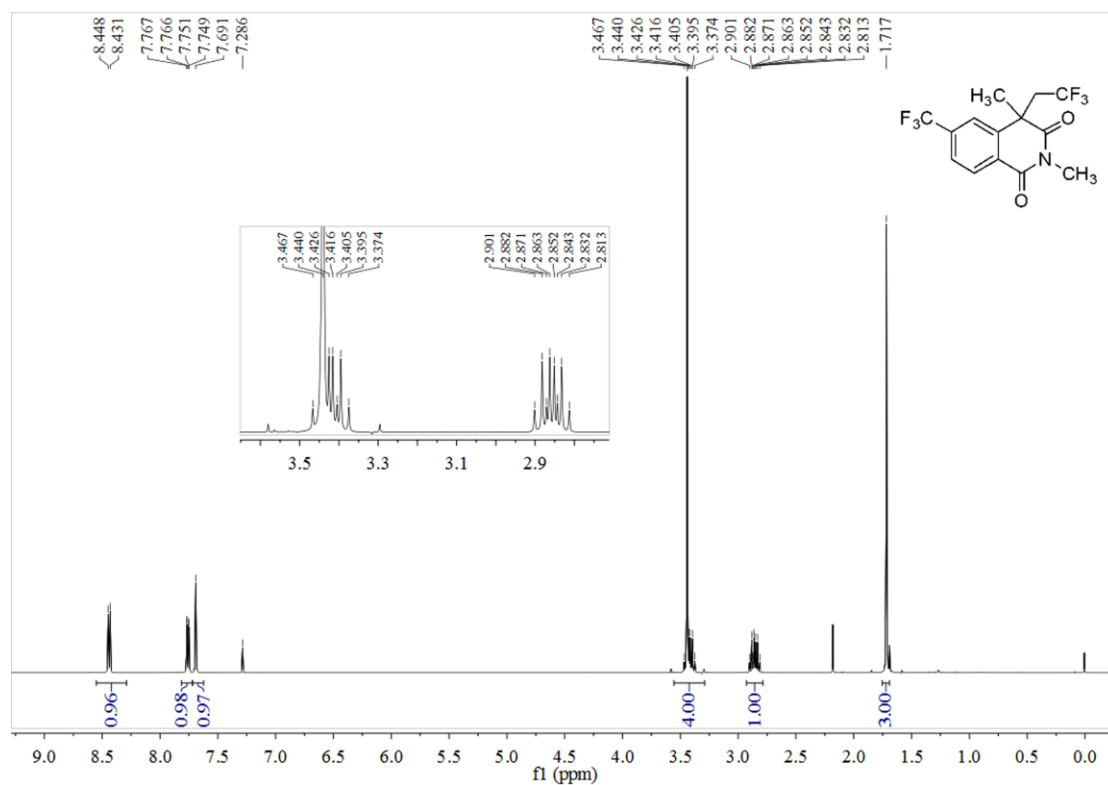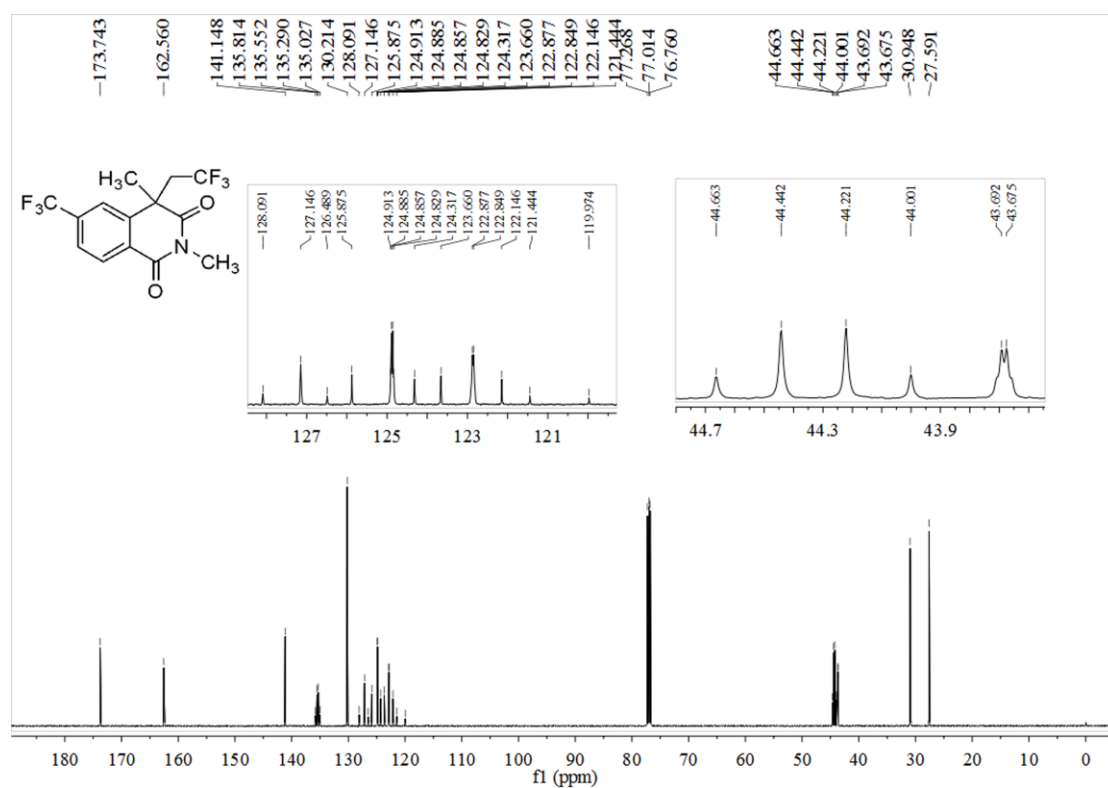

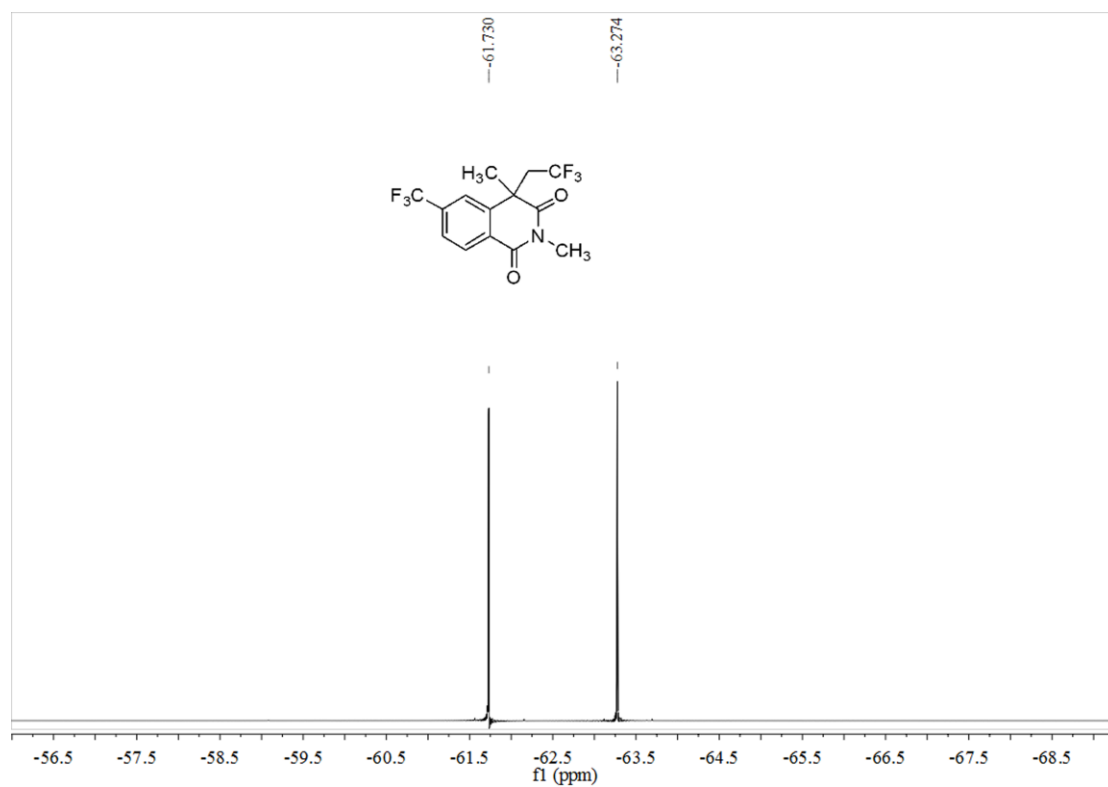

$^1\text{H}$  NMR,  $^{13}\text{C}$  NMR and  $^{19}\text{F}$  NMR spectra of compound **5g** :

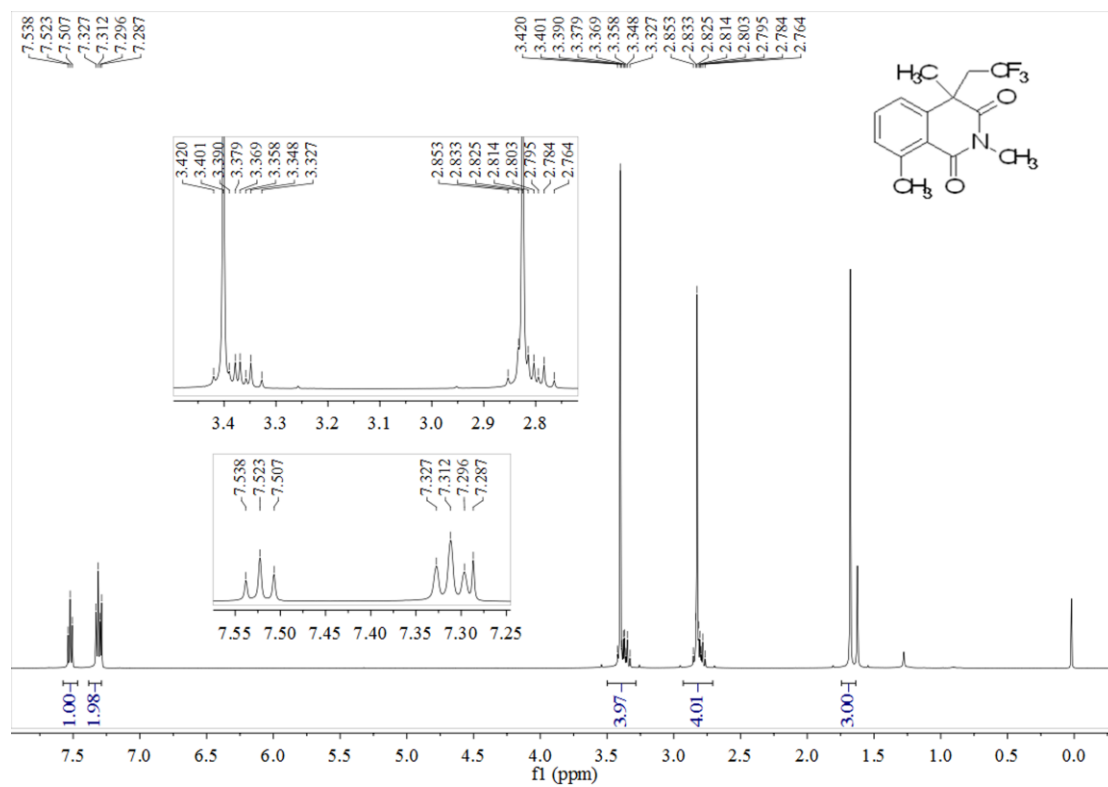

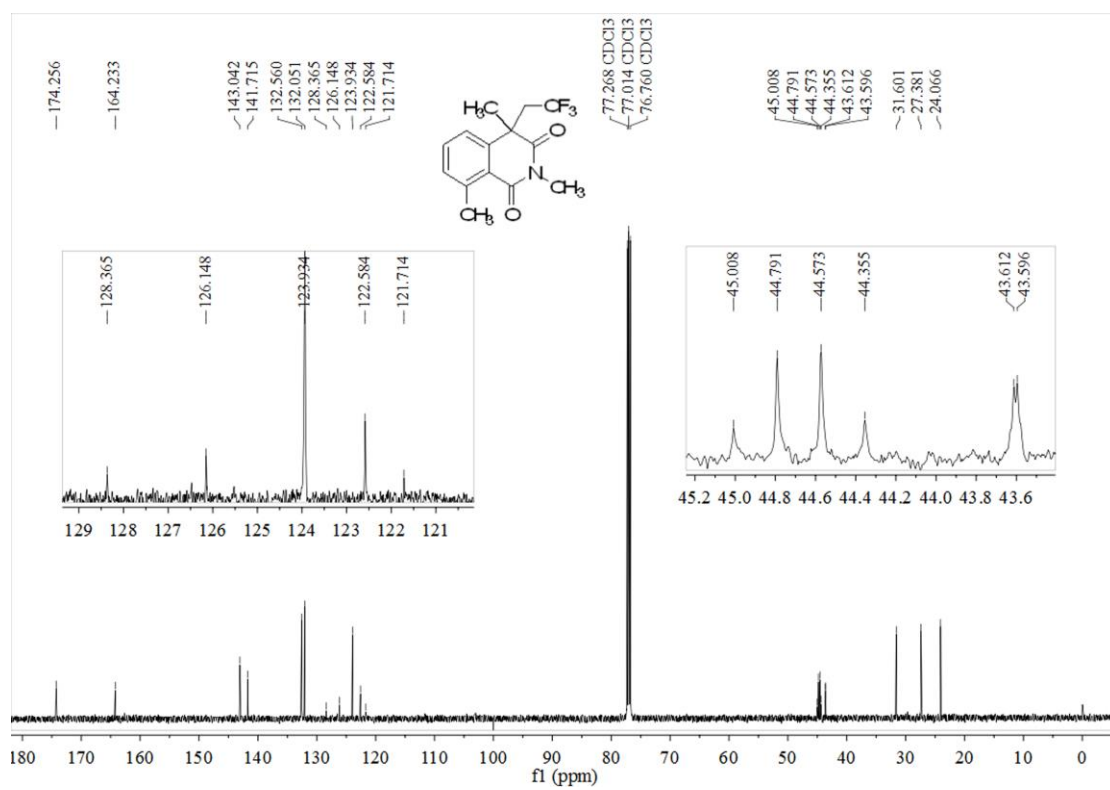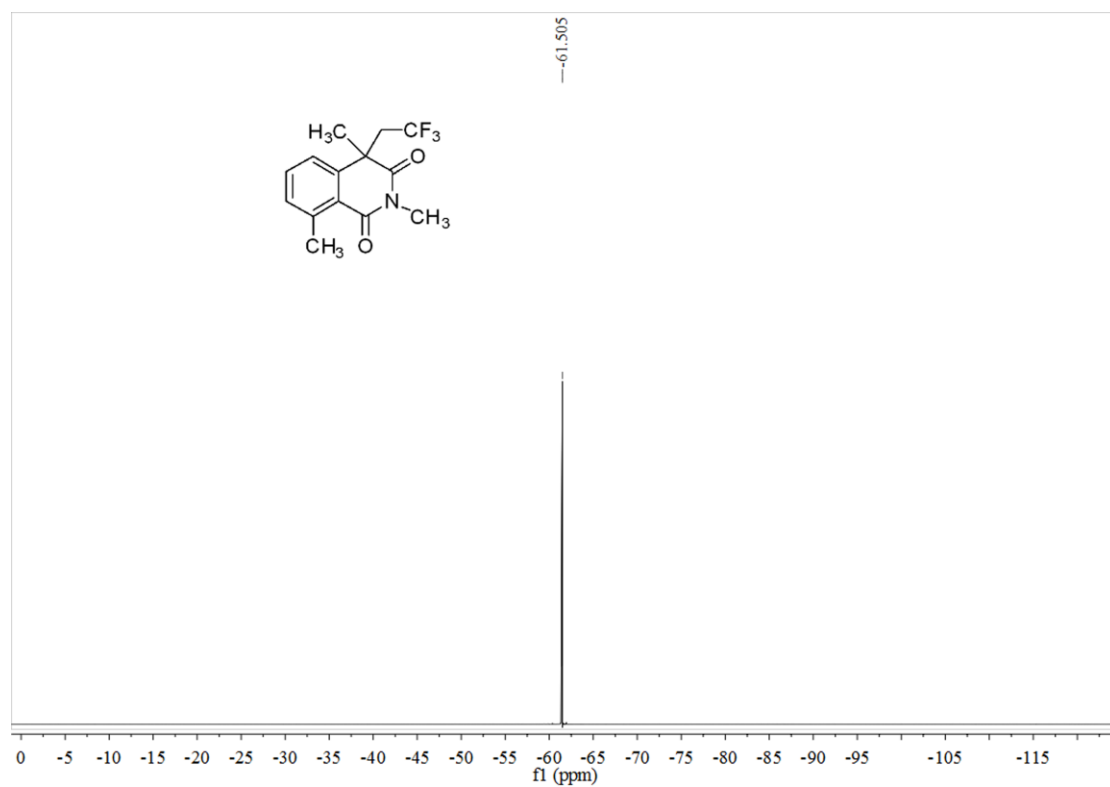

$^1\text{H}$  NMR,  $^{13}\text{C}$  NMR and  $^{19}\text{F}$  NMR spectra of compound **5h** :

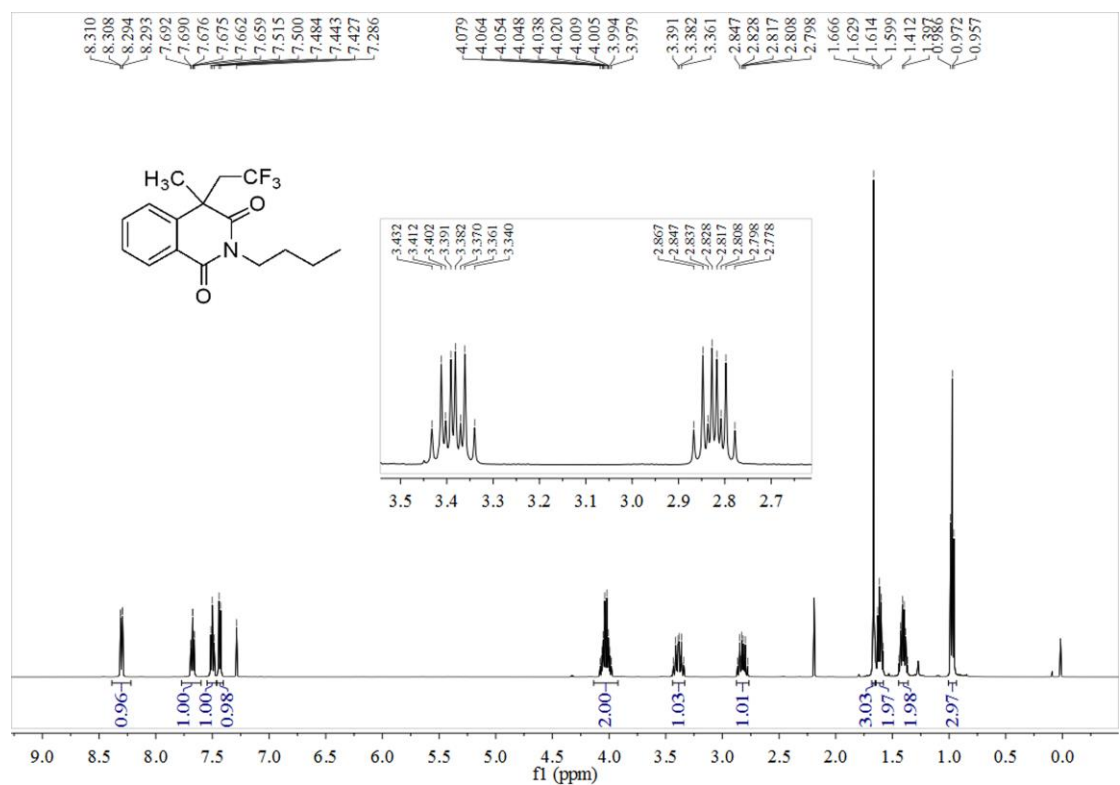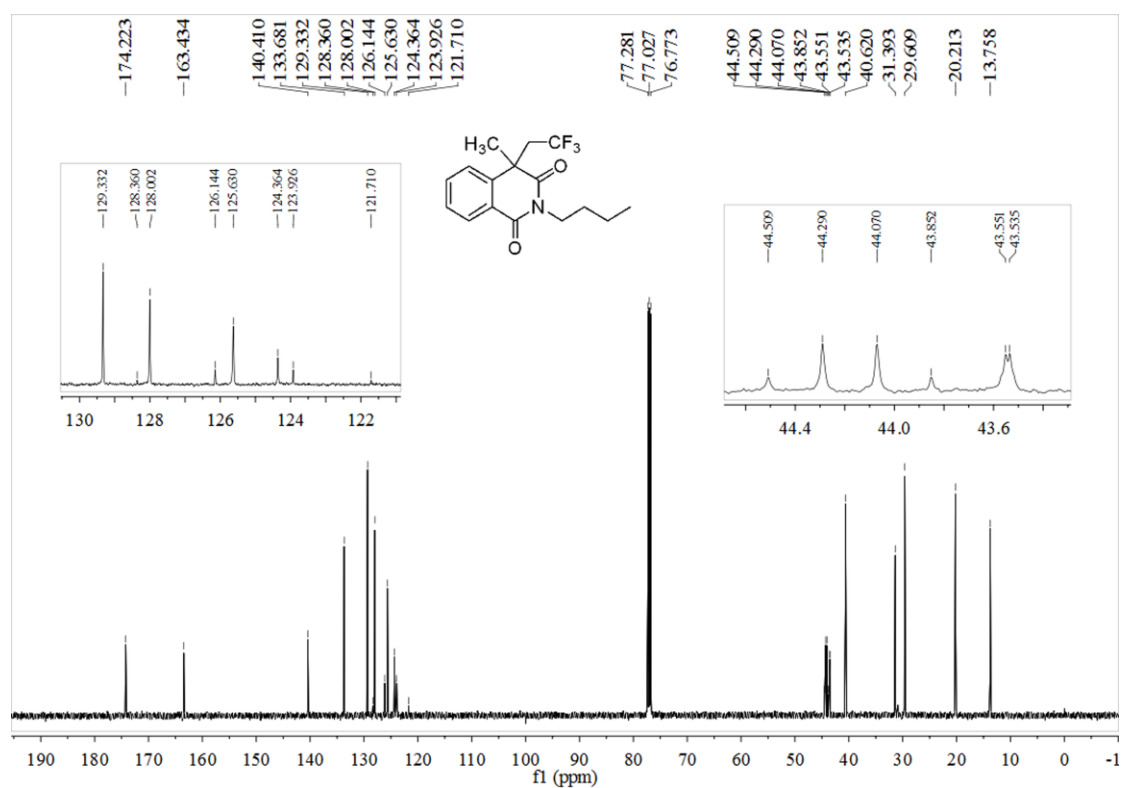

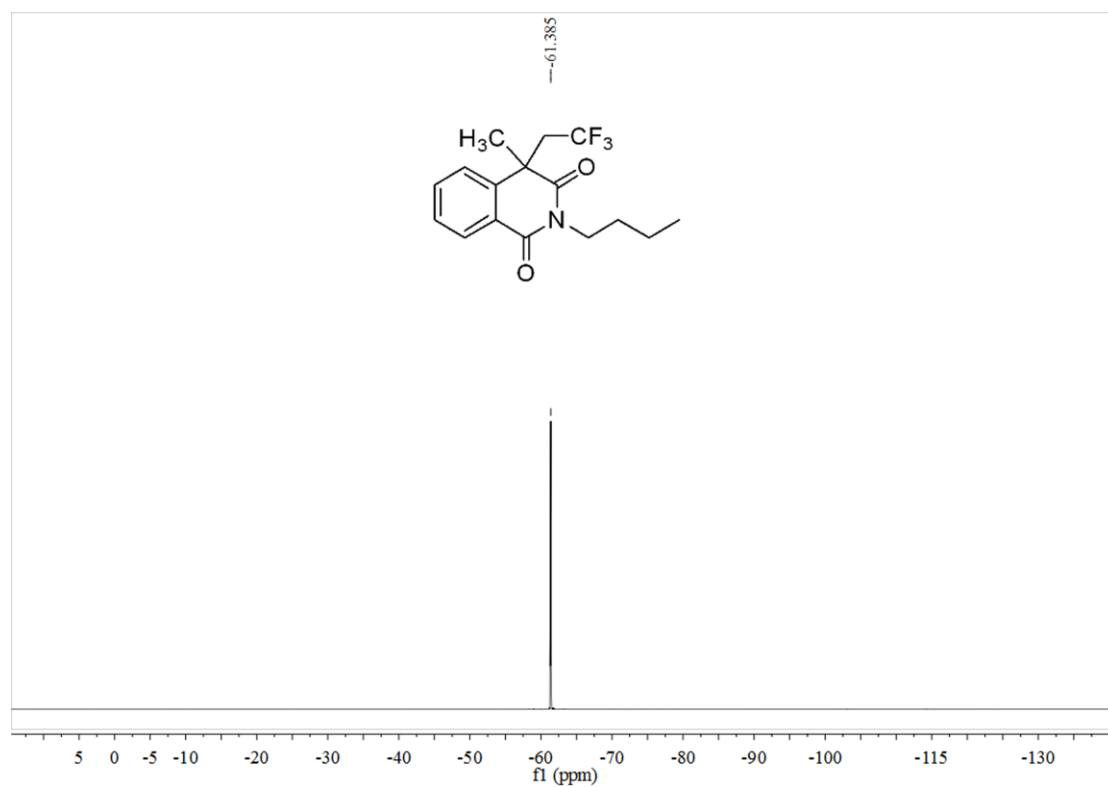

$^1\text{H}$  NMR,  $^{13}\text{C}$  NMR and  $^{19}\text{F}$  NMR spectra of compound **5i** :

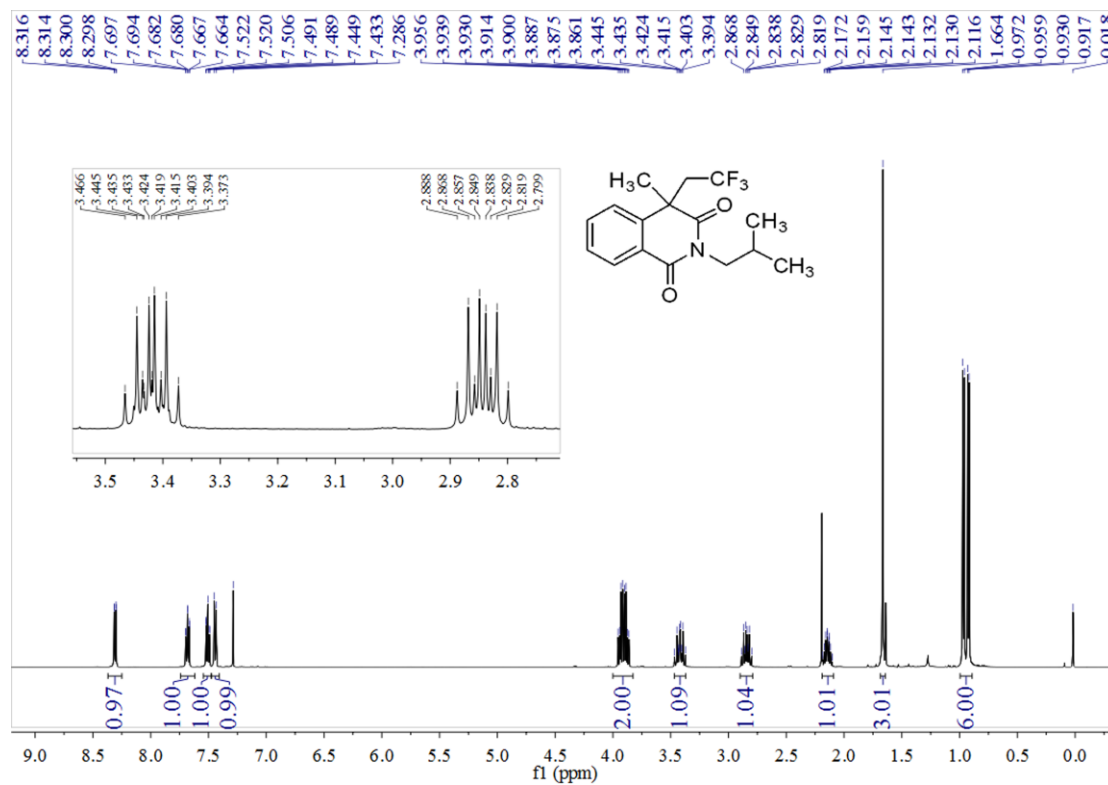

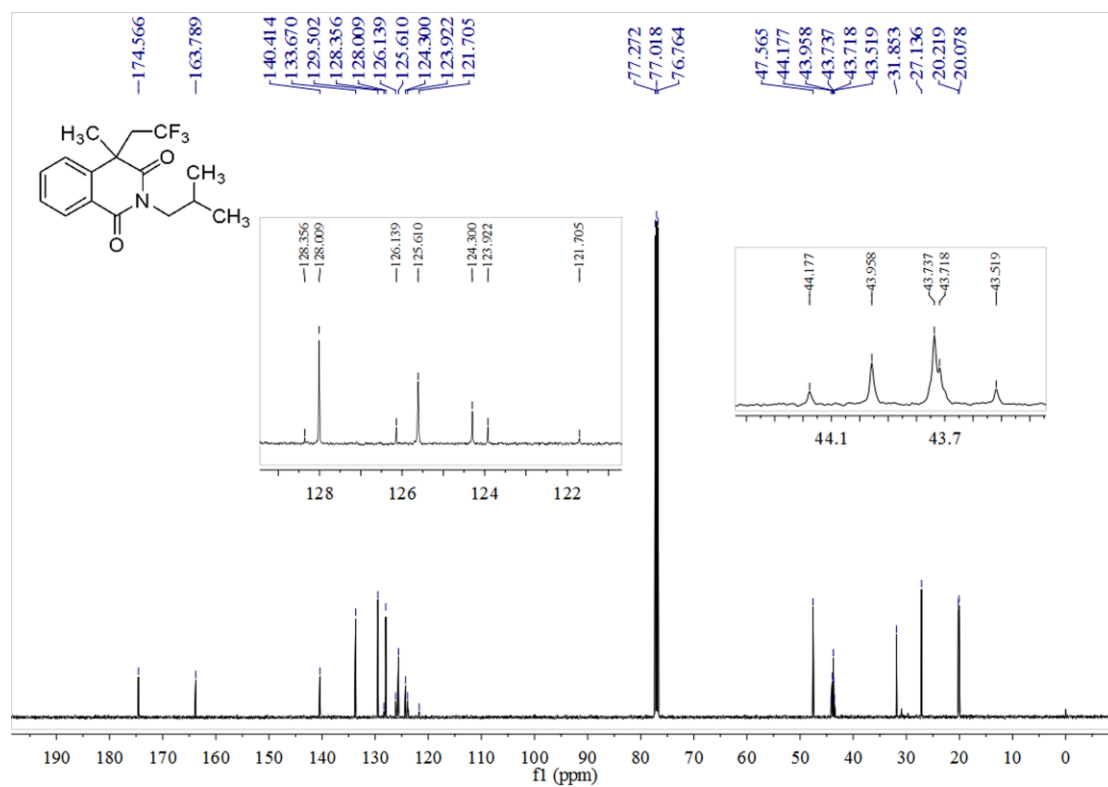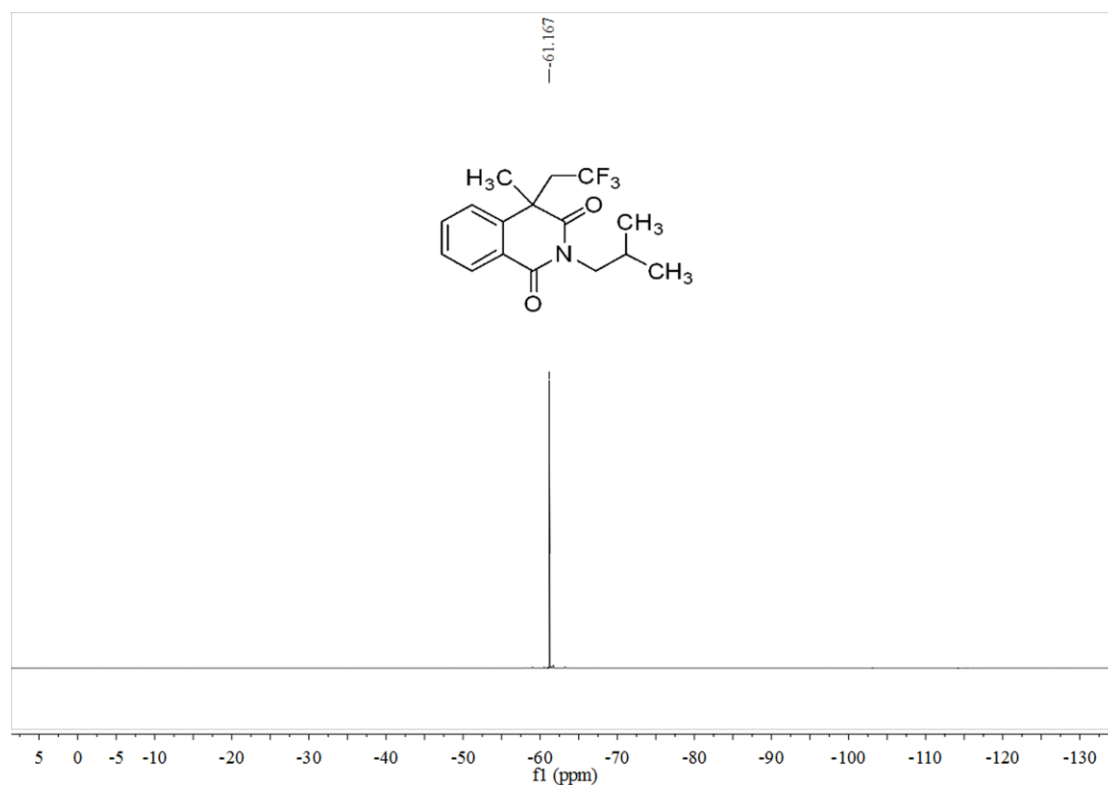

Supplement: c7ob02226c1.pdf [file c7ob02226c1.pdf]
